# Supplementary material for: A cross-sectional study measuring vanadium and chromium levels in paediatric patients with CKD
Source: PubMed Central journal article supplement — BMJ Open. 2017 Jun 6;7(5):e014821. doi: 10.1136/bmjopen-2016-014821 (PMC5734203; doi:10.1136/bmjopen-2016-014821), 2017-06-06
Supplement: bmjopen-2016-014821.draft_revisions.pdf [file bmjopen-2016-014821.draft_revisions.pdf]

# BMJ Open

## A Cross-Sectional Study Measuring Vanadium and Chromium Levels in Pediatric CKD Patients

|                                 |                                                                                                                                                                                                                                                                                                                                                                                                                                                                                                                                                                |
|---------------------------------|----------------------------------------------------------------------------------------------------------------------------------------------------------------------------------------------------------------------------------------------------------------------------------------------------------------------------------------------------------------------------------------------------------------------------------------------------------------------------------------------------------------------------------------------------------------|
| Journal:                        | <i>BMJ Open</i>                                                                                                                                                                                                                                                                                                                                                                                                                                                                                                                                                |
| Manuscript ID                   | bmjopen-2016-014821                                                                                                                                                                                                                                                                                                                                                                                                                                                                                                                                            |
| Article Type:                   | Research                                                                                                                                                                                                                                                                                                                                                                                                                                                                                                                                                       |
| Date Submitted by the Author:   | 20-Oct-2016                                                                                                                                                                                                                                                                                                                                                                                                                                                                                                                                                    |
| Complete List of Authors:       | Filler, Guido; London Health Sciences Centre Children's Hospital, Paediatrics; Western University, Paediatrics<br>Kobrzynski, Marta; London Health Sciences Centre Children's Hospital, Paediatrics<br>Sidhu, Hargun; London Health Sciences Centre Children's Hospital, Paediatrics<br>Belostotsky, Vladimir; Hamilton Health Sciences, Paediatrics<br>Huang, Shih-Han; London Health Sciences Centre, Nephrology<br>McIntyre, CW; University of Western Ontario, Division of Nephrology<br>Yang, Liju; Western University, Pathology and Laboratory Medicine |
| <b>Primary Subject Heading</b>: | Renal medicine                                                                                                                                                                                                                                                                                                                                                                                                                                                                                                                                                 |
| Secondary Subject Heading:      | Paediatrics, Public health                                                                                                                                                                                                                                                                                                                                                                                                                                                                                                                                     |
| Keywords:                       | Paediatric nephrology < PAEDIATRICS, PUBLIC HEALTH, TOXICOLOGY, Chronic renal failure < NEPHROLOGY, Environmental Impact on Health                                                                                                                                                                                                                                                                                                                                                                                                                             |
|                                 |                                                                                                                                                                                                                                                                                                                                                                                                                                                                                                                                                                |

SCHOLARONE™  
Manuscripts

only

## A Cross-Sectional Study Measuring Vanadium and Chromium Levels in Paediatric CKD Patients

Guido Filler<sup>1\*\*§</sup>, MD, PhD, FRCPC, Marta Kobrzynski<sup>1\*</sup> BSc., Hargun Kaur Sidhu<sup>1</sup>,  
Vladimir Belostotsky<sup>2</sup>, MD, PhD, FRCPCH (UK), Shih-Han S Huang<sup>1\*\*</sup>, MD, FRCPC,  
Chris McIntyre<sup>1\*\*</sup>, MD, PhD, Liju Yang<sup>§</sup>, PhD

**Affiliations:** <sup>1</sup>Department of Paediatrics, Division of Paediatric Nephrology, Children's Hospital, \*Lilbeth Caberto Kidney Clinical Research Unit, London Health Sciences Centre, and Departments of \*Medicine, Division of Nephrology, and <sup>§</sup>Pathology and Laboratory Medicine, Schulich School of Medicine & Dentistry, University of Western Ontario, London, Ontario, Canada; and <sup>2</sup>Department of Paediatrics, Division of Paediatric Nephrology, McMaster Children's Hospital, Hamilton, Ontario, Canada

**Address correspondence to:** Dr. Guido Filler, Professor of Paediatrics, Medicine and Pathology & Laboratory Medicine, Children's Hospital, London Health Sciences Centre, University of Western Ontario, 800 Commissioners Road East, Rm B1-138A, London ON, Canada, N6A 5W9, [guido.filler@lhsc.on.ca](mailto:guido.filler@lhsc.on.ca), +1-519-685-8377

**Short title:** Vanadium in CKD

**Funding Source:** This study was supported through funding from Hamilton Health Sciences in the form of a New Investigator Fund Award (NIF13312) awarded to Dr. Vladimir Belostotsky.

**Financial Disclosure:** The authors have no financial relationships relevant to this article to disclose.

**Conflict of Interest:** The authors have no conflicts of interest relevant to this article to disclose.

**Clinical Trial Registration:** [clinicaltrials.gov](https://clinicaltrials.gov), NCT02126293,  
<https://clinicaltrials.gov/ct2/show/NCT02126293>

**Abbreviations:** Vanadium (V), Chromium (Cr), International Agency for Research on Cancer (IARC), chronic kidney disease (CKD), High Resolution Sector Field Inductively Coupled Mass Spectrometry (HR-SF-ICP-MS), Centers for Disease Control (CDC).

Word Count: Abstract: 281; Manuscript: 3,104

## Abstract

**Objectives:** Although many of the secondary effects of high levels of vanadium (V) and chromium (Cr) overlap with symptoms commonly seen in paediatric patients with chronic kidney disease (CKD), plasma V and Cr levels in paediatric CKD patients are understudied.

**Design:** Ancillary cross-sectional study to a prospective longitudinal randomized controlled trial.

**Setting:** Children's Hospital of Western Ontario, London Health Sciences Centre, London, Ontario, Canada.

**Participants:** 36 children and adolescents 4-18 years of age with CKD.

**Interventions:** 1-6 trace element measurements per patient. Cystatin C estimated glomerular filtration rate (eGFR) was calculated using the Filler formula. Plasma V and Cr levels were measured using HR-SF-ICP-MS. Anthropomorphic data and other blood parameters were collected from our electronic chart program. Data for water V and Cr levels were obtained from the Ontario Water (Stream) Quality Monitoring Network.

**Primary and Secondary Outcome Measures:** Primary: plasma zinc levels; Secondary: cystatin C eGFR, plasma chromium, copper, molybdenum, vanadium.

**Results:** Median (IQR) eGFR was 51 mL/min/1.73 m<sup>2</sup> (35, 75). V levels were significantly greater than the 97.5th percentile of the reference interval of 0.088 µg/L and 32 patients had at least one set of V levels above the published reference interval. The median Cr level was 0.43 µg/L (0.36, 0.54), which was also significantly greater than the established reference interval. V and Cr levels were moderately correlated. Only some of our patients had high environmental exposure.

**Conclusions:** Our study suggests that paediatric patients with CKD have elevated plasma levels of V and Cr. This may be the result of both environmental exposure and a low eGFR. It may be necessary to monitor V and Cr levels in patients with an eGFR <30 mL/min/1.73m<sup>2</sup>.

**Trial Registration:** NCT02126293; HC #172241

### Strengths and Limitations of the Study

- This is the first study to examine V and Cr in children with CKD.
- Our study has a strong cross-sectional design in combination with longitudinal data and a reasonable number of patients for a paediatric study. The instruments used to measure the trace elements are highly precise.
- Our study links publicly-available data measuring trace elements in drinking water to detailed descriptions of patients to differentiate environmental and CKD-related accumulation of V and Cr.
- More subjects would have lead to more precise data, and our patient cohort has a bias towards milder CKD stages. We did not control for fluid or food intake.
- There are no detailed studies on the age dependency of paediatric V and Cr concentrations.

## Introduction

Vanadium (V, atomic number 23) and chromium (Cr, atomic number 24) are located beside each other on the periodic table and share many points of similarity. Both are predominantly excreted by the kidneys,<sup>1 2</sup> are associated with normal human health and with the pathogenesis of several diseases (i.e. essential and toxic),<sup>3-6</sup> and occur naturally in our surrounding environment.<sup>7 8</sup> Metallic V and Cr do not occur in nature and are instead are found as compounds in different valence states.<sup>8-10</sup> Humans can be exposed to V and Cr through the air, but the majority of contact stems from food and water.<sup>7 8 11</sup> They are usually present in low, harmless concentrations in various foods (particularly seafood for V).<sup>1</sup> Some nutritional supplements and vitamins also contain V, whose levels can exceed healthy levels.<sup>4 11</sup>

The principle pentavalent form of V can easily enter a cell via phosphate and sulphate ion channels, rendering this version of V very toxic.<sup>12</sup> V also interferes with phosphate-containing enzymes<sup>3 4</sup> and can activate several genes and participate in the inflammatory response. The highest initial concentrations of V are found in the kidneys, liver, and lungs, and in the long-term, it is stored in the bones and muscles.<sup>13 14</sup> The effects of V on human health are largely dependent on the type of compound,<sup>11</sup> dose, duration and route of exposure.<sup>3 4 11</sup> The common hexavalent form of Cr easily enters cells through facilitated uptake, which is more efficient than the simple diffusion used to take up the trivalent form. Free radicals are created in cells when Cr (VI) is reduced to Cr (III).<sup>8</sup> It is distributed to and accumulated by the erythrocyte and the highest concentrations of Cr are found in the kidneys and liver. The absorption fraction of ingested Cr is higher when dietary intakes are lower. The major route of elimination of absorbed Cr is through the urine, with unabsorbed Cr recovered in the faeces,<sup>2</sup> while V is also mostly excreted through the urine, with some excretion in the faeces.<sup>15</sup>

1  
2  
3 V has many systemic effects, including gastrointestinal, respiratory, haematological,  
4 immunological, and cardiovascular effects.<sup>1 7 16 17</sup> The International Agency for Research on  
5 Cancer (IARC) has classified V pentoxide as “possibly carcinogenic.” Other data also suggest  
6 the potential of V to induce developmental effects in humans. It is unknown whether children are  
7 affected by V-containing compounds in the same ways as adults.<sup>11</sup>  
8  
9

10  
11  
12  
13  
14  
15  
16 The IARC has classified Cr as carcinogenic. Inhalation has been shown to cause lung cancer in  
17 humans, and exposure has been shown to cause tumours in the stomach, intestinal tract, and  
18 lungs in animals.<sup>8</sup> Depending on the route of exposure, trivalent and hexavalent Cr are also  
19 associated with gastrointestinal, immunological, haematological (including anaemia),  
20 reproductive, developmental, and other serious effects. Hexavalent Cr is more toxic than its  
21 trivalent form, but trace element measurements rarely differentiate between the two.  
22  
23  
24  
25  
26  
27  
28  
29  
30

31  
32 Several studies show that the serum concentrations of V and Cr are higher in adult haemodialysis  
33 patients and chronic kidney disease (CKD) patients; this suggests that they accumulate in the  
34 body.<sup>5 18-20</sup> Another study confirmed this association by measuring trace elements in the hair of  
35 adult haemodialysis patients.<sup>6</sup> Although data in paediatric CKD patients are elusive, we  
36 hypothesized that similar to dialysis patients, we would find elevated V and Cr levels in  
37 paediatric CKD patients.<sup>21</sup> We also hypothesized that levels would increase with worsening  
38 glomerular filtration rate (GFR).  
39  
40  
41  
42  
43  
44  
45  
46  
47  
48  
49  
50  
51  
52  
53  
54  
55  
56  
57  
58  
59  
60

## Patients and Methods

### STUDY DESIGN

The study adhered to the Declaration of Helsinki. The Research Ethics Board of the University of Western Ontario approved the study as part of an intervention study on zinc supplementation in CKD patients centred at McMaster University (NCT02126293; HC #172241; REB #104976). Patients were recruited from April 2014 to April 2016. Given that almost all patients enrolled within the first 3 months had elevated V and Cr levels, we created this ancillary cross-sectional study to specifically analyze the elevated trace elements in this population. The primary outcome of the original study was patient plasma zinc levels, while the secondary outcomes were the patient plasma trace element levels.

### STUDY POPULATION

See Figure 1 for inclusion and exclusion criteria. We performed an interim analysis on 36 study patients (16 female, 44%; average age  $11.85 \pm 4.5$  years, age range 4.42-18.98 years) with various renal pathologies and diagnosed CKD (as per the KDIGO guidelines<sup>22</sup>) using the modified Schwartz formula<sup>23</sup> at the London Health Sciences Centre, a tertiary paediatric nephrology centre. Since this was an ancillary study, the study did not specifically select for the stage of CKD, the patient's age, or the location of the patient's residence, which could introduce potential bias. Patients also had different numbers of repeated samples, depending on their clinic visits. Patients did not record their fluid or food intake, which could influence the results. To address potential bias due to contaminated drinking water, we matched the postal code of the patient's home with provincial 2014 water quality data.

### EXPERIMENTAL METHODS

1  
2  
3 eGFR was calculated using the Filler formula,<sup>24</sup> using the new international reference  
4 materials.<sup>25</sup> Plasma samples were collected in BD K<sub>2</sub>-EDTA Royal Blue Vacutainer tubes  
5  
6 (Reference #368381). V and Cr levels were measured using High Resolution Sector Field  
7  
8 Inductively Coupled Mass Spectrometry (HR-SF-ICP-MS;  
9  
10 [https://ltig.lhsc.on.ca/?action=view\\_rec&test=Vanadium%2C%20Plasma;](https://ltig.lhsc.on.ca/?action=view_rec&test=Vanadium%2C%20Plasma;)  
11  
12 [https://ltig.lhsc.on.ca/?action=view\\_rec&test=Chromium%2CPlasma;](https://ltig.lhsc.on.ca/?action=view_rec&test=Chromium%2CPlasma;) last accessed 27-Jun-  
13  
14 2016). Total imprecision (CV) of the V measurements was 10% at low concentration (0.100  
15  
16 µg/L), 4% at medium concentration (0.257 µg/L), and 8% at high concentration (0.356 µg/L).  
17  
18 For Cr, the total imprecision (CV) was 3% (0.82 µg/L), 4% (5.40 µg/L) and 5% (43.60 µg/L),  
19  
20 respectively. Anthropomorphic data, the first three digits of patients' postal codes, and other  
21  
22 blood parameters were collected from our electronic chart program, PowerChart (Cerner). Data  
23  
24 were entered into an Excel spread sheet (Excel for Mac 2011, version 14.4.4.).  
25  
26  
27  
28  
29  
30  
31  
32 Data analysis was performed using GraphPad Prism 5 for Mac OS X, version 5.0f, and HLM  
33  
34 7.01, Scientific Software International, Inc., Skokie, IL, USA. Data were analysed for normal  
35  
36 distribution using the D'Agostino & Pearson omnibus normality test. As most data were  
37  
38 normally distributed, parametric methods were used for all statistical tests, with the exception of  
39  
40 the V and Cr levels and estimated glomerular filtration rate (eGFR), which were expressed as  
41  
42 median and interquartile range (25<sup>th</sup>, 75<sup>th</sup> percentile). Spearman's rank correlation analysis was  
43  
44 used to analyse the correlation analysis of V levels that were not normally distributed. The  
45  
46 Wilcoxon Signed Rank test was used to compare the V and Cr levels with the 97.5<sup>th</sup> percentile as  
47  
48 neither V nor Cr levels were normally distributed. A repeated measures analysis was conducted  
49  
50 to determine whether the results of repeated measurements affected the original results.  
51  
52  
53  
54  
55  
56  
57  
58  
59  
60



Heat maps depicting V and Cr levels in drinking water were generated using data collected by the Government of Ontario for their Provincial (Stream) Water Quality Monitoring Network, which can be found at <https://www.ontario.ca/data/provincial-stream-water-quality-monitoring-network>. Only the most recent data were used (2014, [https://files.ontario.ca/moe\\_mapping/downloads/2Water/PWQMN\\_by\\_year/pwqmn\\_rawdata\\_2014.xlsx](https://files.ontario.ca/moe_mapping/downloads/2Water/PWQMN_by_year/pwqmn_rawdata_2014.xlsx)). The station coordinate data (found at [https://files.ontario.ca/moe\\_mapping/downloads/2Water/PWQMN1.xlsx](https://files.ontario.ca/moe_mapping/downloads/2Water/PWQMN1.xlsx)) was used to determine the longitude and latitude of each testing station in order to generate the map. Since each station had a varying number of results, only the most recent measurement was used, unless that measurement was a negative number, in which case the second most recent measurement was used. Measurements used in the maps were taken between spring and winter of 2014. The V or Cr measurement at each station and the longitude and latitude of each station were then uploaded in two separate files to open source mapping software created by Pete Warden, which can be found at [www.openheatmap.com](http://www.openheatmap.com). Patients' locations in Southern Ontario were mapped using the first three digits of their postal codes (data on file).

## Results

Thirty-six children and adolescents with CKD and at least one set of trace element data were included in the study (Figure 1, Table 1). Median eGFR was 51 mL/min/1.73 m<sup>2</sup> (35, 75). V levels were not normally distributed (D'Agostino & Pearson omnibus test p-value <0.0001). The median V level was 0.12 µg/L (0.09, 0.18) and the maximum V level was 3.350 µg/L. Thirty-two patients had at least one set of V levels above the published reference interval of 0.088 µg/L (Table 2) in either unit, and the results of 75 of the 94 total tests (80%) were above the interval. The V levels were significantly greater than the 97.5<sup>th</sup> percentile of the reference interval of

1  
2  
3 0.088  $\mu\text{g/L}$  (Wilcoxon Signed Rank test  $p < 0.0001$ ). There was a weak negative correlation  
4  
5 between the V levels and the eGFR (Spearman  $r = -0.1209$ , Figure 2). In patients with repeated V  
6  
7 levels, there was no statistically significant change between the first and the last measured level  
8  
9 (Figure 3).  
10

11  
12  
13 Cr levels were not normally distributed (D'Agostini & Pearson omnibus test  $p\text{-value} < 0.0001$ ).  
14  
15 The median Cr level was 0.43  $\mu\text{g/L}$  (0.36, 0.54), which was significantly greater than the 97.5<sup>th</sup>  
16  
17 percentile of the reference interval of 0.31  $\mu\text{g/L}$  (Wilcoxon Signed Rank test  $p < 0.0001$ ). Thirty-  
18  
19 four patients had at least one Cr level that was above the reference interval for healthy children  
20  
21 and adults (77 of 94 tests [82%]). There was a very weak non-significant positive correlation  
22  
23 between Cr and eGFR (Spearman  $r = 0.09111$ ,  $p = 0.3851$ , Figure 4). The median level did not  
24  
25 change from first to last measurement, and the perceived rise in the values was not statistically  
26  
27 significant ( $p = 0.3381$ , Wilcoxon matched-pairs signed rank test, Figure 5). There was a moderate  
28  
29 but significant correlation between V and Cr levels (Spearman  $r = 0.5973$ ,  $p < 0.0001$ ). Similar  
30  
31 results were found with a repeated measures analysis (HLM 7.01, Scientific Software  
32  
33 International, Inc., Skokie, IL, USA) that accounted for all measurement points.  
34  
35  
36  
37  
38  
39

40  
41 The V levels measured in water ranged from 0.00257  $\mu\text{g/L}$  to 5.87  $\mu\text{g/L}$ , and the measured Cr  
42  
43 levels in water ranged from 0.0099  $\mu\text{g/L}$  to 4.32  $\mu\text{g/L}$ . The mapped V data shows higher  
44  
45 concentrations grouped along the Detroit and Saint Clair Rivers as well as the shores around  
46  
47 Lake Erie and Lake Huron (Figure 6). The mapped Cr levels show the same general distribution  
48  
49 pattern but with slightly larger values overall (Figure 7).  
50

51  
52  
53 Comparing the two maps to a map of the patients' locations from the study, we found that  
54  
55 although some groupings of patients corresponded to the areas of high V and Cr (such as  
56  
57  
58  
59  
60

1  
2  
3 Windsor, St. Thomas, Hanover, and Owen Sound, n=8), others were located in areas of low  
4 concentrations. Comparing these distributions leads us to believe that our findings are the result  
5  
6 of both environmental factors and impaired kidney function.  
7  
8  
9

## 10 11 **Discussion**

12  
13  
14 Our study demonstrates a high prevalence of elevated V and Cr levels in paediatric CKD  
15 patients. With V, this trend is strongest in patients with an eGFR of less than 30 mL/min/1.73  
16 m<sup>2</sup>. In 28 of the 36 patients, V and Cr exposure in drinking water did not seem to be the major  
17 contributing factor.  
18  
19  
20  
21  
22

23  
24 The results are concerning as chronic V and Cr toxicities have many serious systemic effects. For  
25 V this includes neurocognitive deficits and neurobehavioral abilities, which are regularly seen in  
26  
27 paediatric CKD patients.<sup>26</sup> Cr appears even more toxic; with oral exposure, it has been linked to  
28  
29 (i) death, and at lethal doses respiratory effects such as pleural effusion, pulmonary oedema,  
30  
31 bronchitis, and bronchopneumonia, and cardiovascular effects such as cardiopulmonary arrest,  
32  
33 and a drop in cardiac output, heart rate and blood pressure; (ii) gastrointestinal effects from Cr in  
34  
35 drinking water such as oral ulcer, diarrhoea, abdominal pain, indigestion, and vomiting; (iii)  
36  
37 haematological effects from Cr in drinking water including leucocytosis and immature  
38  
39 neutrophils; (iv) musculoskeletal effects such as rhabdomyolysis; (v) hepatic effects such as the  
40  
41 development of jaundice, and increased bilirubin, serum lactic dehydrogenase, alanine and  
42  
43 aspartate aminotransferase, and  $\gamma$ -glutamyl transferase; (vi) renal effects such as renal failure  
44  
45 characterized by proteinuria, haematuria and anuria, necrosis of renal tubules, oliguria, and  
46  
47 destruction of the tubular epithelium of the kidneys, highly elevated serum creatinine and blood  
48  
49 urea nitrogen; (vii) Cr supplementation has also been associated with weight loss.  
50  
51  
52  
53  
54  
55  
56  
57  
58  
59  
60

1  
2  
3 If ingested orally, V can cause mild gastrointestinal irritation such as stomach cramps, mild  
4 diarrhoea, and nausea.<sup>7</sup> It can also induce haematological effects such as microcytic  
5 erythrocytosis.<sup>7</sup> Immunological effects such as significant decreases in lymphocyte stimulation  
6 and an increase in the incidence of viral and bacterial respiratory infections have been noted in  
7 children, a vulnerable population.<sup>16</sup> Another study found a significant association between V and  
8 systolic blood pressure and pulse pressure in an elderly population.<sup>17</sup> Of course, haematopoiesis  
9 is impaired in the advanced stages of CKD and nephrotoxicity should be avoided.

10  
11  
12 Homeostasis of both trace elements depends on uptake and elimination. Uptake occurs through  
13 different types of environmental exposures, namely through the air, water, food, and soil. More  
14 than 70% of Cr in the environment comes from anthropogenic sources, such as non-ferrous base  
15 metal smelters, refineries, leather tanning industries, urban storm water runoff, effluent streams  
16 from pulp and paper mills and discharges from thermal generating stations.<sup>27</sup> In Canada, it is  
17 largely released into the atmosphere through different means of pollution, namely industrial  
18 processes (1/3), stationary fuel consumption (1/2), and transportation (3/20).<sup>28</sup> Ground water and  
19 other fresh water contain V (in the form of  $H_2VO_4^-$ ) at an approximate concentration of 1.17  
20  $\mu\text{g/L}$ , fats, fruits, and vegetables at 1-5  $\mu\text{g/kg}$ , and meat, seafood, whole grains, and dairy  
21 products at 5-30  $\mu\text{g/kg}$ .<sup>29</sup> The daily intake via food is usually between 10-200  $\mu\text{g}$ .<sup>30</sup> Cr (III), the  
22 less toxic isoform of Cr, is also naturally found in many foods.<sup>8</sup> Both hexavalent and trivalent Cr  
23 are found in water.<sup>27</sup>

24  
25  
26 Although previous studies have shown elevated V and Cr levels in adult dialysis patients,<sup>19</sup> we  
27 are unaware of any published work showing high V and Cr levels in paediatric CKD patients  
28 other than in abstract form.<sup>31</sup> Since CKD patients are usually polyuric and develop polydipsia,  
29 their exposure to V in drinking water is several-fold greater than the general population.

1  
2  
3 Combined with the fact that V is mainly eliminated through the kidneys,<sup>1 3</sup> this vulnerable  
4 population's environmental exposure to toxic trace elements may pose a danger, especially if  
5 they have polyuria and polydipsia and drink contaminated water. We suspect that in addition to  
6 our patients' low V and Cr clearance, their significantly greater exposure to V and Cr in drinking  
7 water is the reason for their high levels of both elements.  
8  
9

10  
11  
12  
13  
14  
15  
16 There are few guidelines for maximum V concentrations in the environment, and those that exist  
17 either cover a wide range from different sources, are outdated, or were determined using  
18 extremely limited and unacceptable methodologies.<sup>32</sup> The Office of Environmental Health  
19 Hazard Assessment in California released a statement in August of 2000 in response to the  
20 Department of Health Service's proposed level not exceeding 50 µg/L, recommending a lower  
21 level of 15 µg/L.<sup>33</sup> Meanwhile, Environment Canada released Federal Environmental Quality  
22 Guidelines for V in May of 2016, listing the predicted no-effect concentration for marine water  
23 at 5 µg/L and for freshwater at 120 µg/L. The Canadian federal government does not include V  
24 in their most recent Guidelines for Canadian Drinking Water Quality (2014),<sup>34</sup> nor is it included  
25 in the water quality guidelines used by Ontario.<sup>35</sup> Other Canadian water quality guidelines list  
26 standards ranging from 3.9 to 250 µg/L.<sup>36 37</sup> The standard for Cr in Ontario drinking water is 50  
27 µg/L. The Centers for Disease Control (CDC) has established some minimal risk levels (MRLs)  
28 for humans, defined as an estimate of daily human exposure to V and Cr that is likely to be  
29 without an appreciable risk of adverse effects over a specified duration of exposure.<sup>7</sup> These  
30 limits are as follows: oral acute (none), intermediate-duration (10 µg/kg/day for V and 0.5  
31 µg/kg/day), and chronic-duration (none for V and 0.9 µg/kg/day for Cr).  
32  
33  
34  
35  
36  
37  
38  
39  
40  
41  
42  
43  
44  
45  
46  
47  
48  
49  
50  
51  
52

53  
54  
55 The average concentration of Cr in uncontaminated surface and marine water is generally below  
56 1.0 µg/L,<sup>28</sup> but in Ontario these numbers can be much greater at sites most severely affected by  
57  
58  
59  
60

1  
2  
3 pollution. This includes the St. Marys River system with concentrations of 31 000 µg/g dry  
4 weight (d.w.) in Tannery Bay and concentrations exceeding 5120 µg/g (d.w.) in the Welland  
5 River downstream from a steel manufacturing plant compared to 10 µg/g (d.w.) upstream.<sup>28</sup> Up  
6 to 1920 µg/g (d.w.) has been found in Detroit River sediments and 564 µg/g (d.w.) in Hamilton  
7 Harbour sediments.<sup>6</sup> Elevated concentrations of two- to four-fold above local background levels  
8 have also been reported in sediments from Lake Simcoe, the Detroit River, Lake Ontario off the  
9 Niagara River and the St. Lawrence River.<sup>30</sup> Our catchment area overlaps with several of these  
10 areas.  
11  
12  
13  
14  
15  
16  
17  
18  
19  
20  
21

22  
23 Twenty-eight of our patients were not from the highly polluted areas. However, some of the  
24 highest V and Cr levels were observed in patients with a low GFR, despite living in areas with  
25 low V and Cr exposure. We believe that the high water intake with CKD and the low GFR are  
26 two additional factors that result in the high prevalence of elevated V and Cr in these patients.  
27  
28  
29  
30  
31

32  
33 Clearly, the scientific evidence indicating both the safe levels and the resultant toxicity of V in  
34 our air, water, and food is lacking, of poor quality, and conflicting, especially considering how  
35 little, if any, of this research has been done on i) vulnerable populations such as children and ii)  
36 children with impaired renal or hepatic function. The guidelines for Cr are slightly clearer  
37 considering its increased toxicity, but there are still little data on chronic safe levels and toxicity.  
38 Since high V and Cr levels are seen in such a large proportion of our study population, and since  
39 the environmental levels of V and Cr and the resultant health implications are mostly unknown,  
40 the question becomes: how can we limit the exposure of children with poor renal function to  
41 these potentially toxic trace elements?  
42  
43  
44  
45  
46  
47  
48  
49  
50  
51  
52  
53  
54  
55  
56  
57  
58  
59  
60

1  
2  
3 Several studies have shown the potential of chelating agents such as tiron in reducing V body  
4 burden and toxicity.<sup>7</sup> The safety and efficacy of this strategy has not been established in children.  
5  
6 Therefore, preventing high exposure may be the only feasible strategy, but using bottled water  
7  
8 with low trace element levels may be very costly.  
9  
10

11  
12  
13 A strength of our study is its cross-sectional design in combination with longitudinal data and a  
14 reasonable number of patients for a paediatric pilot study. Another strength is the high precision  
15 of the instruments used to measure the trace elements. There are still several limitations. More  
16 subjects would have lead to more precise data, and our patient cohort has a bias towards milder  
17 CKD stages, which could have potentially minimized the trace element levels seen in this  
18 population. We did not assess whether the patients drink municipal water, well water or bottled  
19 water (with presumably lower concentrations) nor did we assess their total fluid intake. We also  
20 did not control for food intake. Certain foods such as fish, shellfish<sup>38</sup> and grains and cereals<sup>39</sup>  
21 may contain dangerous V concentrations. These potential confounders could have minimized the  
22 environmental impact of the high levels in this population. Finally, detailed studies on the age  
23 dependency of paediatric V and Cr concentrations are elusive.  
24  
25  
26  
27  
28  
29  
30  
31  
32  
33  
34  
35  
36  
37  
38  
39

40 Despite these limitations, our data robustly demonstrate a high prevalence of elevated V and Cr  
41 levels in children with CKD. There was a trend toward higher V levels with worsening kidney  
42 function. Our data would favour monitoring V and Cr in paediatric CKD patients, especially in  
43 areas with high exposures or in very polyuric patients.  
44  
45  
46  
47  
48  
49

### 50 **Acknowledgements**

51  
52  
53 The authors would like to thank Michael Miller, PhD, for helping our team by analysing all of  
54 the data using a repeated measures analysis.  
55  
56  
57  
58  
59  
60

## References

1. Heinemann G, Fichtl B, Vogt W. Pharmacokinetics of vanadium in humans after intravenous administration of a vanadium containing albumin solution. *Br J Clin Pharmacol* 2003;55(3):241-5. [published Online First: 2003/03/13]
2. Organization WH. Chromium in Drinking-water Geneva2003 [Available from: [http://www.who.int/water\\_sanitation\\_health/dwq/chemicals/chromium.pdf](http://www.who.int/water_sanitation_health/dwq/chemicals/chromium.pdf) accessed July 13 2016.
3. Mukherjee B, Patra B, Mahapatra S, et al. Vanadium--an element of atypical biological significance. *Toxicol Lett* 2004;150(2):135-43. doi: 10.1016/j.toxlet.2004.01.009
4. Gruzewska K, Michno A, Pawelczyk T, et al. Essentiality and toxicity of vanadium supplements in health and pathology. *J Physiol Pharmacol* 2014;65(5):603-11.
5. Hosokawa S, Yamaguchi O, Yoshida O. Vanadium transfer during haemodialysis. *Int Urol Nephrol* 1991;23(4):407-9.
6. Ochi A, Ishimura E, Tsujimoto Y, et al. Trace elements in the hair of hemodialysis patients. *Biol Trace Elem Res* 2011;143(2):825-34. doi: 10.1007/s12011-010-8948-y
7. Services USDoHaH. Toxicological Profile for Vanadium United States: United States Government; September 2012 [Available from: <http://www.atsdr.cdc.gov/ToxProfiles/tp58.pdf> accessed July 11 2016.
8. Services USDoHaH. Toxicological Profile for Chromium United States: United States Government; September 2012 [Available from: <http://www.atsdr.cdc.gov/ToxProfiles/tp58.pdf> accessed July 11 2016.
9. Lagerkvist B, Nordberg, G.F., Vouk, V. Vanadium. Handbook on the toxicology of metals. 2 ed. Amsterdam: Elsevier Science Publishers 1986.
10. Barceloux DG. Vanadium. *J Toxicol Clin Toxicol* 1999;37(2):265-78.
11. cite? T--ht. ToxGuide for Vanadium V. In: Services UDOHaH, ed., 2012.
12. Rehder D. Biological and medicinal aspects of vanadium. *Inorg Chem Commun* 2003(6):604-17.
13. Organization WH. Trace elements in human nutrition and health. Geneva: WHO 1996.
14. Crebelli R, Leopardi P. Long-term risks of metal contaminants in drinking water: a critical appraisal of guideline values for arsenic and vanadium. *Annali dell'Istituto superiore di sanita* 2012;48(4):354-61. doi: DOI: 10.4415/ANN\_12\_04\_03 [published Online First: 2012/12/19]
15. Europe WHOROf. Chapter 6.12: Vanadium 2000 [Available from: [http://www.who.int/water\\_sanitation\\_health/dwq/chemicals/chromium.pdf](http://www.who.int/water_sanitation_health/dwq/chemicals/chromium.pdf) accessed July 21 2016.
16. Lener J. KJ, Kodl M., et al. Health effects of environmental exposure to vanadium. Vanadium in the environment Part 2: Health Effects. New York, NY: John Wiley & Sons 1998:1-19.
17. Jacobs L, Buczynska A, Walgraeve C, et al. Acute changes in pulse pressure in relation to constituents of particulate air pollution in elderly persons. *Environ Res* 2012;117:60-7. doi: 10.1016/j.envres.2012.05.003
18. Bello-Reuss EN, Grady TP, Mazumdar DC. Serum vanadium levels in chronic renal disease. *Ann Intern Med* 1979;91(5):743.
19. Tonelli M, Wiebe N, Hemmelgarn B, et al. Trace elements in hemodialysis patients: a systematic review and meta-analysis. *BMC Med* 2009;7:25. doi: 10.1186/1741-7015-7-25



20. Shaban H, Ubaid-Ullah M, Berns JS. Measuring vitamin, mineral, and trace element levels in dialysis patients. *Semin Dial* 2014;27(6):582-6. doi: 10.1111/sdi.12260
21. Filler G, Felder S. Trace elements in dialysis. *Pediatr Nephrol* 2014;29(8):1329-35. doi: 10.1007/s00467-013-2585-6 [published Online First: 2013/08/21]
22. Kidney Disease: Improving Global Outcomes CKD-MBDWG. KDIGO clinical practice guideline for the diagnosis, evaluation, prevention, and treatment of Chronic Kidney Disease-Mineral and Bone Disorder (CKD-MBD). *Kidney Int Suppl* 2009(113):S1-130. doi: 10.1038/ki.2009.188
23. Schwartz GJ, Munoz A, Schneider MF, et al. New equations to estimate GFR in children with CKD. *Journal of the American Society of Nephrology : JASN* 2009;20(3):629-37. doi: 10.1681/ASN.2008030287
24. Filler G, Lepage N. Should the Schwartz formula for estimation of GFR be replaced by cystatin C formula? *Pediatric nephrology* 2003;18(10):981-5. doi: 10.1007/s00467-003-1271-5
25. Grubb A, Blirup-Jensen S, Lindstrom V, et al. First certified reference material for cystatin C in human serum ERM-DA471/IFCC. *Clin Chem Lab Med* 2010;48(11):1619-21. doi: 10.1515/CCLM.2010.318 [published Online First: 2010/11/03]
26. Barth A, Schaffer AW, Konnaris C, et al. Neurobehavioral effects of vanadium. *Journal of toxicology and environmental health Part A* 2002;65(9):677-83. doi: 10.1080/15287390252900377 [published Online First: 2002/05/09]
27. Agency EP. Chromium in Drinking Water 2015 [Available from: <https://www.epa.gov/dwstandardsregulations/chromium-drinking-water> accessed July 15 2016.
28. Canada H. Chromium and its Compounds: Government of Canada; 2007 [updated December 14 2007. accessed October 12 2016.
29. Rehder D. The future of/for vanadium. *Dalton Trans* 2013;42(33):11749-61. doi: 10.1039/c3dt50457c
30. Scior T, Guevara-Garcia A, Bernard P, et al. Are vanadium compounds drugable? Structures and effects of antidiabetic vanadium compounds: a critical review. *Mini Rev Med Chem* 2005;5(11):995-1008.
31. Sidhu H, Filler G, Belostotsky V, et al. High prevalence of elevated Vanadium levels in CKD patients. *Pediatric nephrology* 2016;31(10):1907-08.
32. BHPBilliton. EKATI Diamond Mine - Site-Specific Water Quality Objective for Vanadium Canada April 2012 [Available from: <http://www.mvlwb.ca/Boards/WLWB/Registry/2012/W2012L2-0001/W2012L2-0001 - Ekati - Report - SSWQO - Vanadium - Apr 26 12.pdf> accessed July 11 2016.
33. Assessment OoEHH. Proposed Notification Level for Vanadium California 2000 [Available from: <http://oehha.ca.gov/water/notification-level/proposed-notification-level-vanadium> accessed July 11 2016 2016.
34. Water F-P-TCoD. Guidelines for Canadian Drinking Water Quality Canada October 2014 [Available from: [http://www.hc-sc.gc.ca/ewh-semt/alt\\_formats/pdf/pubs/water-eau/sum\\_guide-res\\_recom/sum\\_guide-res\\_recom\\_2014-10\\_eng.pdf](http://www.hc-sc.gc.ca/ewh-semt/alt_formats/pdf/pubs/water-eau/sum_guide-res_recom/sum_guide-res_recom_2014-10_eng.pdf) accessed July 11 2016.
35. Canada GoC-EaCC. Water Quality Guidelines Used by Ontario Canada 2016 [updated February 17, 2016. Available from: <https://www.ec.gc.ca/indicateurs-indicators/default.asp?lang=en&n=93177156-1> accessed July 11 2016.

- 1  
2  
3 36. Environment OMot. Soil, Ground Water and Sediment Standards for Use Under Part XV.1 of  
4 the Environmental Protection Act Canada April 15, 2011 [Available from:  
5 [https://dr6j45jk9xcmk.cloudfront.net/documents/998/3-6-3-sediment-standards-  
7 en.pdf](https://dr6j45jk9xcmk.cloudfront.net/documents/998/3-6-3-sediment-standards-<br/>6 en.pdf) accessed July 11 2016.
- 8 37. Environment TCCoMot. Vanadium Canada 1997 [updated 1999. Available from:  
9 <http://cegg-rcqe.ccme.ca/download/en/286> accessed July 11 2016.
- 10 38. Copat C, Arena G, Fiore M, et al. Heavy metals concentrations in fish and shellfish from  
11 eastern Mediterranean Sea: consumption advisories. *Food and chemical toxicology : an  
12 international journal published for the British Industrial Biological Research Association*  
13 2013;53:33-7. doi: 10.1016/j.fct.2012.11.038 [published Online First: 2012/12/06]  
14
- 15 39. Imtiaz M, Rizwan MS, Xiong S, et al. Vanadium, recent advancements and research  
16 prospects: A review. *Environment international* 2015;80:79-88. doi:  
17 10.1016/j.envint.2015.03.018 [published Online First: 2015/04/22]  
18  
19  
20  
21  
22  
23  
24  
25  
26  
27  
28  
29  
30  
31  
32  
33  
34  
35  
36  
37  
38  
39  
40  
41  
42  
43  
44  
45  
46  
47  
48  
49  
50  
51  
52  
53  
54  
55  
56  
57  
58  
59  
60

### Contributors' Statement

Contributors GF and VB articulated the conceptual framework for both the original RCT study and this ancillary study. GF developed the analytical approach and GF and MK analysed the data. GF, MK, and HKS drafted and edited the manuscript. VB, SHSH and LY contributed to the interpretation of data, added intellectual content during manuscript preparation and provided valuable feedback on various aspects of the manuscript. All authors read and approved the final manuscript.

For peer review only

| Variable                                              | n (%)    |
|-------------------------------------------------------|----------|
| <b>Gender</b>                                         |          |
| Male                                                  | 22 (58%) |
| Female                                                | 16 (42%) |
| <b>Age group (years)</b>                              |          |
| 4 to 10                                               | 18 (47%) |
| 11 to 15                                              | 9 (24%)  |
| 16 to 18                                              | 11 (29%) |
| <b>Primary Diagnosis</b>                              |          |
| <i>Hereditary</i>                                     |          |
| Renal Dysplasia                                       | 11 (31%) |
| Metabolic Disorders                                   | 5 (14%)  |
| Nephronophthisis                                      | 2 (6%)   |
| Autosomal Recessive Polycystic Kidney Disease         | 2 (6%)   |
| Autosomal Dominant Polycystic Kidney Disease          | 1 (3%)   |
| Congenital Nephrotic Syndrome                         | 1 (3%)   |
| Alport Syndrome                                       | 1 (3%)   |
| <i>Acquired</i>                                       |          |
| Reflux Nephropathy                                    | 4 (11%)  |
| Haemolytic Uremic Syndrome                            | 3 (8%)   |
| Glomerulonephritis/Focal Segmental Glomerulosclerosis | 3 (8%)   |
| Tubulopathy                                           | 2 (6%)   |
| Ischaemic Renal Injury                                | 1 (3%)   |
| <b>Kidney Transplant</b>                              |          |
| Yes                                                   | 13 (36%) |
| No                                                    | 23 (64%) |

**Table 1. Patient Demographics.**

| Paediatric Reference Intervals |       |       |        |       |
|--------------------------------|-------|-------|--------|-------|
|                                | µg/L  |       | µmol/L |       |
|                                | Lower | Upper | Lower  | Upper |
| Vanadium                       | 0.032 | 0.088 | 0.6    | 1.7   |
| Chromium                       | 0.13  | 0.31  | 2.5    | 6     |

**Table 2. Paediatric reference intervals used in our study.** Paediatric-specific vanadium and chromium reference intervals were not available. Source:

[http://www.lhsc.on.ca/lab/memos/Reference\\_Ranges\\_for\\_Trace\\_Elements\\_2014\\_11\\_03.pdf](http://www.lhsc.on.ca/lab/memos/Reference_Ranges_for_Trace_Elements_2014_11_03.pdf).

1  
2  
3 **Figure 1. Patient flowchart.** Of the 42 subjects assessed for eligibility in the study, we included  
4  
5 36 in our analysis. These 36 patients had 94 trace element panel measurements.  
6  
7

8  
9 **Figure 2. Scatter plot of vanadium levels versus eGFR.** Vanadium levels [ $\mu\text{g/L}$ ] were not  
10 normally distributed. The non-linear regression line (one-phase exponential decay) has been  
11 included. GFR was measured in  $\text{mL/min/1.73 m}^2$ . The formula reads:  $Y=(Y_0 - \text{Plateau})\cdot\exp(-$   
12  $K\cdot x) + \text{Plateau}$ , where  $Y_0$  is the value when  $x$  is zero, plateau is  $Y$  at a large value,  $K$  is the rate  
13 constant, and the values were  $Y_0=4.555$ ,  $\text{Plateau}=0.1457$ , and  $K=0.1111$  (GraphPad Prism).  
14  
15  
16  
17  
18  
19

20  
21 **Figure 3. Repeated measures plot of first and last vanadium level in those patients who had**  
22 **repeated levels.** Vanadium levels [ $\mu\text{g/L}$ ] were not normally distributed. While the median  
23 vanadium level lowered from 0.1510 to 0.1410  $\mu\text{g/L}$  and many patients demonstrated an increase  
24 of their vanadium level with repeated measures, this did not reach statistical significance  
25 ( $p=0.4140$ , Wilcoxon matched-pairs signed rank test).  
26  
27  
28  
29  
30  
31  
32

33 **Figure 4. Scatter plot of chromium levels versus eGFR.** Chromium levels [ $\mu\text{g/L}$ ] were not  
34 normally distributed. The non-linear regression line (one-phase exponential decay) has been  
35 included. GFR was measured in  $\text{mL/min/1.73 m}^2$ . The formula reads:  $Y=(Y_0 - \text{Plateau})\cdot\exp(-$   
36  $K\cdot x) + \text{Plateau}$ , where  $Y_0$  is the value when  $x$  is zero, plateau is  $Y$  at a large value,  $K$  is the rate  
37 constant, and the values were  $Y_0=1.641$ ,  $\text{Plateau}=0.4841$ , and  $K=0.09060$  (GraphPad Prism).  
38  
39  
40  
41  
42  
43  
44  
45

46 **Figure 5. Repeated measures plot of first and last chromium level in those patients who had**  
47 **repeated levels.** Chromium levels [ $\mu\text{g/L}$ ] were not normally distributed. The median chromium  
48 level did not change from 0.44  $\mu\text{g/L}$  and the rise in the values was not statistically significant  
49 ( $p=0.3381$ , Wilcoxon matched-pairs signed rank test).  
50  
51  
52  
53  
54  
55  
56  
57  
58  
59  
60

1  
2  
3 **Figure 6. Heat map showing the concentration of vanadium in 2014 in various streams**  
4 **around Southwestern Ontario.** Map created using 2014 data from the Provincial (Stream)  
5  
6 Water Quality Monitoring Network at [https://www.ontario.ca/data/provincial-stream-water-](https://www.ontario.ca/data/provincial-stream-water-quality-monitoring-network)  
7  
8 [quality-monitoring-network](https://www.ontario.ca/data/provincial-stream-water-quality-monitoring-network) in open source software found at [www.openheatmap.com](http://www.openheatmap.com)  
9  
10

11  
12 **Figure 7. Heat map showing the concentration of chromium in 2014 in various streams**  
13 **around Southwestern Ontario.** Map created using 2014 data from the Provincial (Stream)  
14  
15 Water Quality Monitoring Network at [https://www.ontario.ca/data/provincial-stream-water-](https://www.ontario.ca/data/provincial-stream-water-quality-monitoring-network)  
16  
17 [quality-monitoring-network](https://www.ontario.ca/data/provincial-stream-water-quality-monitoring-network) in open source software found at [www.openheatmap.com](http://www.openheatmap.com)  
18  
19  
20  
21  
22  
23  
24  
25  
26  
27  
28  
29  
30  
31  
32  
33  
34  
35  
36  
37  
38  
39  
40  
41  
42  
43  
44  
45  
46  
47  
48  
49  
50  
51  
52  
53  
54  
55  
56  
57  
58  
59  
60

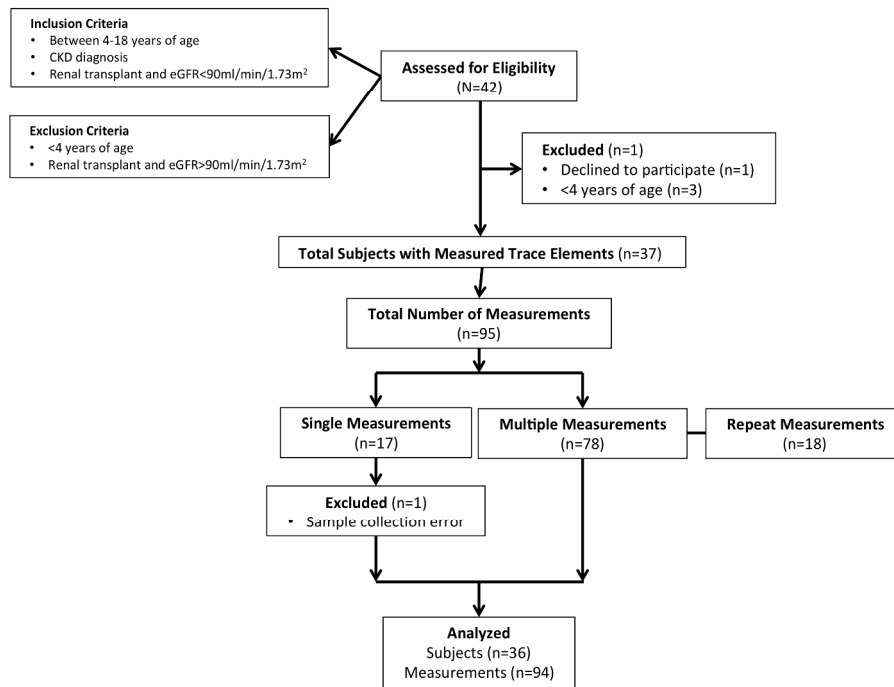

32 Figure 1. Patient flowchart. Of the 42 subjects assessed for eligibility in the study, we included 36 in our  
33 analysis. These 36 patients had 94 trace element panel measurements.

34  
35 1057x793mm (72 x 72 DPI)



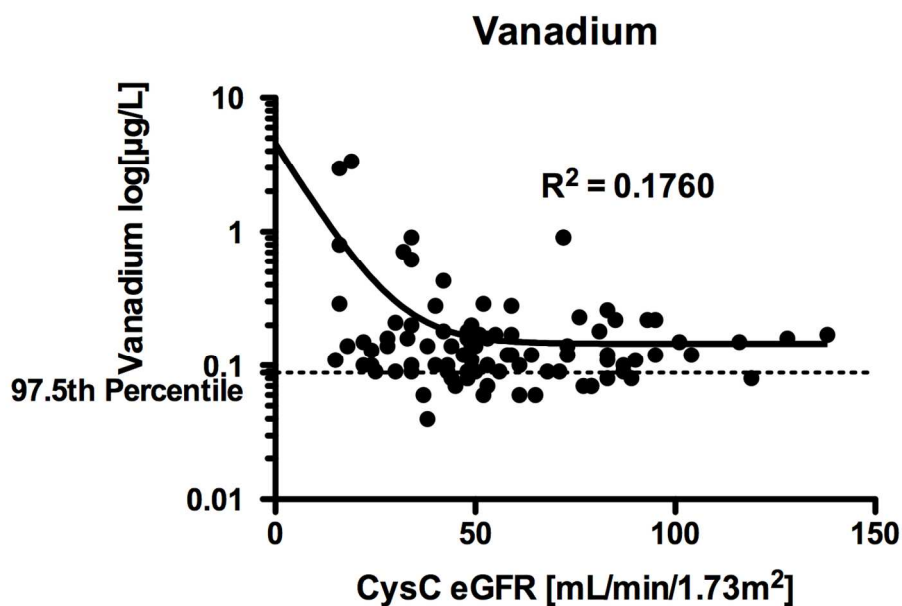

29  
30  
31  
32  
33  
34

Figure 2. Scatter plot of vanadium levels versus eGFR. Vanadium levels [ $\mu\text{g/L}$ ] were not normally distributed. The non-linear regression line (one-phase exponential decay) has been included. GFR was measured in  $\text{mL/min}/1.73 \text{ m}^2$ . The formula reads:  $Y=(Y_0 - \text{Plateau})\cdot\exp(-K\cdot x) + \text{Plateau}$ , where  $Y_0$  is the value when  $x$  is zero, plateau is  $Y$  at a large value,  $K$  is the rate constant, and the values were  $Y_0=4.555$ , Plateau=0.1457, and  $K=0.1111$  (GraphPad Prism).

35  
36  
37  
38  
39  
40  
41  
42  
43  
44  
45  
46  
47  
48  
49  
50  
51  
52  
53  
54  
55  
56  
57  
58  
59  
60

127x85mm (300 x 300 DPI)

1  
2  
3  
4  
5  
6  
7  
8  
9  
10  
11  
12  
13  
14  
15  
16  
17  
18  
19  
20  
21  
22  
23  
24  
25  
26  
27  
28  
29  
30  
31  
32  
33  
34  
35  
36  
37  
38  
39  
40  
41  
42  
43  
44  
45  
46  
47  
48  
49  
50  
51  
52  
53  
54  
55  
56  
57  
58  
59  
60

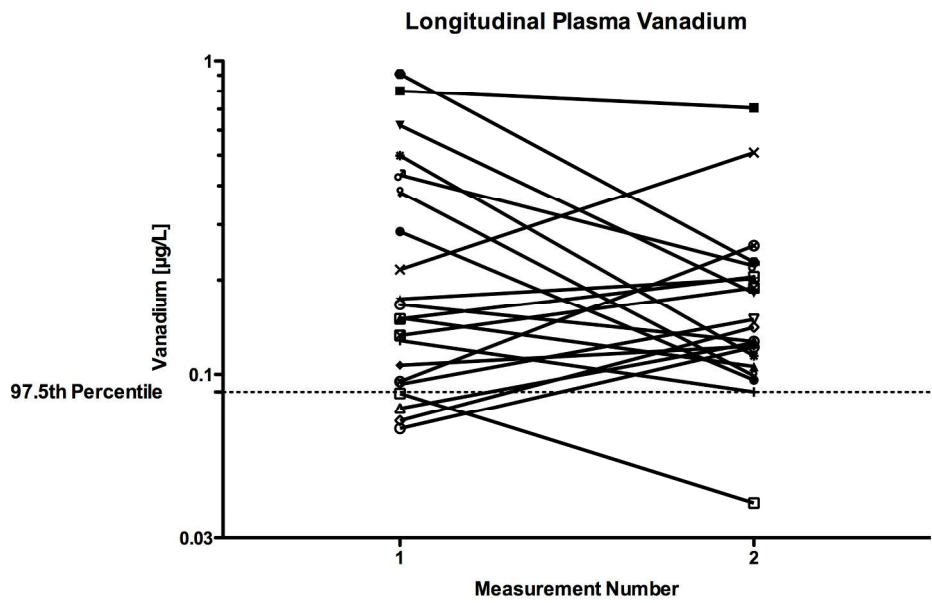

Figure 3. Repeated measures plot of first and last vanadium level in those patients who had repeated levels. Vanadium levels [µg/L] were not normally distributed. While the median vanadium level lowered from 0.1510 to 0.1410 µg/L and many patients demonstrated an increase of their vanadium level with repeated measures, this did not reach statistical significance (p=0.4140, Wilcoxon matched-pairs signed rank test).

214x136mm (300 x 300 DPI)

View only

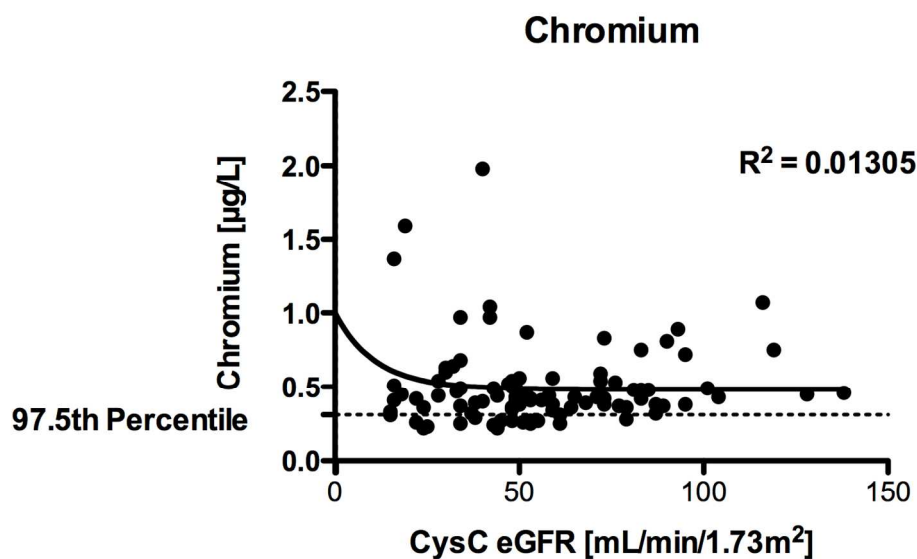

28 Figure 4. Scatter plot of chromium levels versus eGFR. Chromium levels [ $\mu\text{g/L}$ ] were not normally  
29 distributed. The non-linear regression line (one-phase exponential decay) has been included. GFR was  
30 measured in  $\text{mL/min}/1.73 \text{ m}^2$ . The formula reads:  $Y=(Y_0 - \text{Plateau})\cdot\exp(-K\cdot x) + \text{Plateau}$ , where  $Y_0$  is the  
31 value when  $x$  is zero, plateau is  $Y$  at a large value,  $K$  is the rate constant, and the values were  $Y_0=1.641$ ,  
32 Plateau= $0.4841$ , and  $K=0.09060$  (GraphPad Prism).

33 138x85mm (300 x 300 DPI)

34  
35  
36  
37  
38  
39  
40  
41  
42  
43  
44  
45  
46  
47  
48  
49  
50  
51  
52  
53  
54  
55  
56  
57  
58  
59  
60

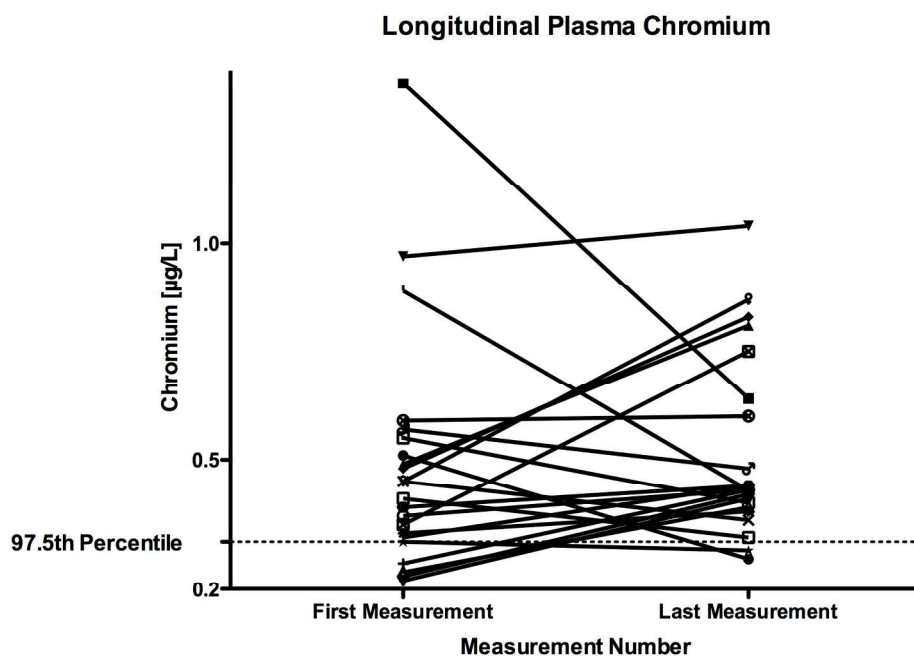

Figure 5. Repeated measures plot of first and last chromium level in those patients who had repeated levels. Chromium levels [ $\mu\text{g/L}$ ] were not normally distributed. The median chromium level did not change from 0.44  $\mu\text{g/L}$  and the rise in the values was not statistically significant ( $p=0.3381$ , Wilcoxon matched-pairs signed rank test).

190x132mm (300 x 300 DPI)

1  
2  
3  
4  
5  
6  
7  
8  
9  
10  
11  
12  
13  
14  
15  
16  
17  
18  
19  
20  
21  
22  
23  
24  
25  
26  
27  
28  
29  
30  
31  
32  
33  
34  
35  
36  
37  
38  
39  
40  
41  
42  
43  
44  
45  
46  
47  
48  
49  
50  
51  
52  
53  
54  
55  
56  
57  
58  
59  
60

### Heat Map Vanadium

OPENHEATMAP

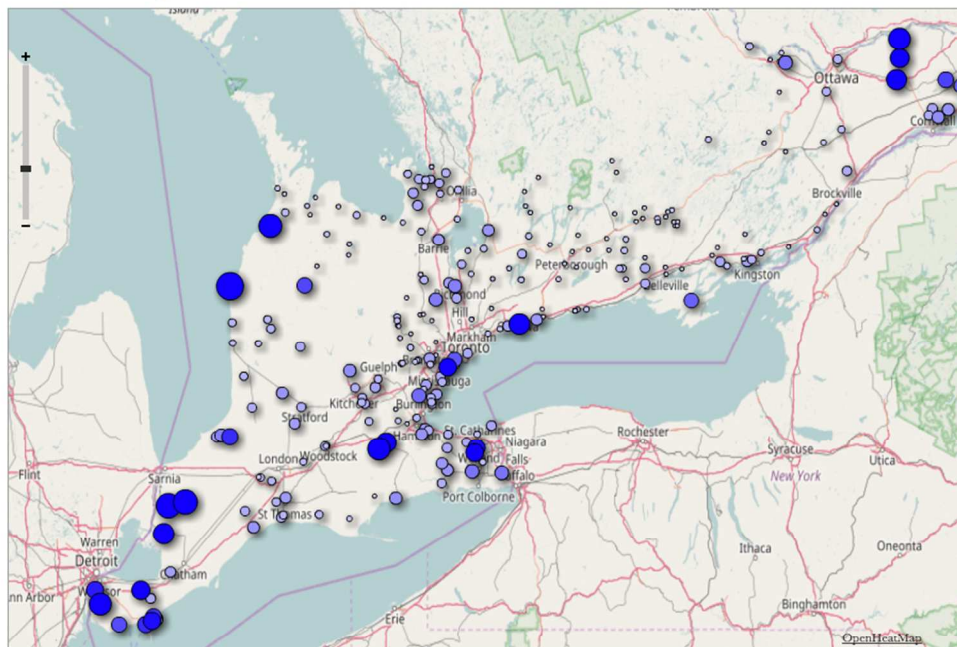

Value 0.119 1.36 2.60

Figure 6. Heat map showing the concentration of vanadium in 2014 in various streams around Southwestern Ontario. Map created using 2014 data from the Provincial (Stream) Water Quality Monitoring Network at <https://www.ontario.ca/data/provincial-stream-water-quality-monitoring-network> in open source software found at [www.openheatmap.com](http://www.openheatmap.com)

330x258mm (72 x 72 DPI)

only

1  
2  
3  
4  
5  
6  
7  
8  
9  
10  
11  
12  
13  
14  
15  
16  
17  
18  
19  
20  
21  
22  
23  
24  
25  
26  
27  
28  
29  
30  
31  
32  
33  
34  
35  
36  
37  
38  
39  
40  
41  
42  
43  
44  
45  
46  
47  
48  
49  
50  
51  
52  
53  
54  
55  
56  
57  
58  
59  
60

### Heat Map Chromium

OPENHEATMAP

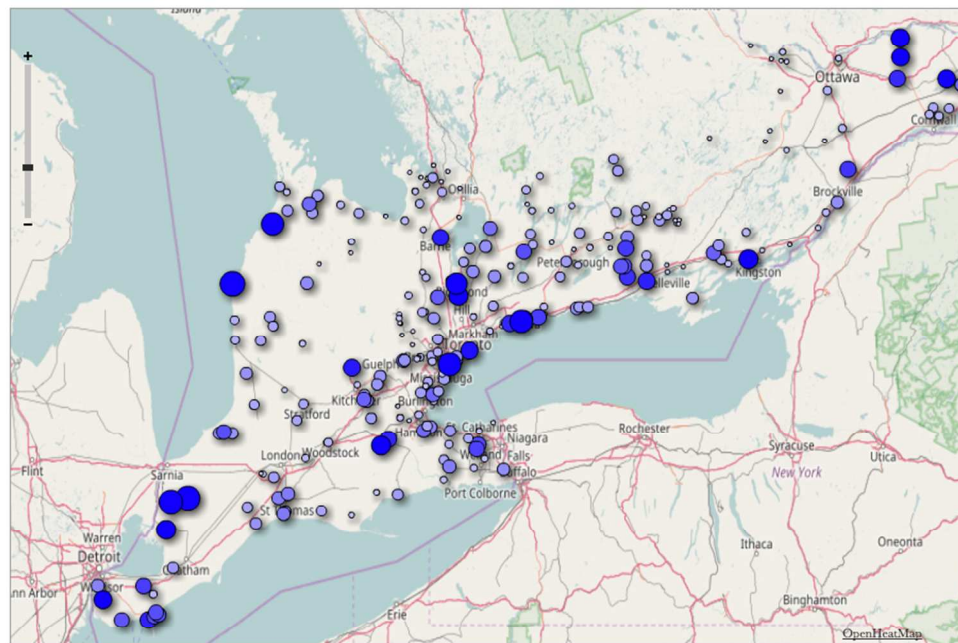

Chromium 0.117 1.21 2.31

Figure 7. Heat map showing the concentration of chromium in 2014 in various streams around Southwestern Ontario. Map created using 2014 data from the Provincial (Stream) Water Quality Monitoring Network at <https://www.ontario.ca/data/provincial-stream-water-quality-monitoring-network> in open source software found at [www.openheatmap.com](http://www.openheatmap.com)

332x257mm (72 x 72 DPI)

STROBE 2007 (v4) Statement—Checklist of items that should be included in reports of *cross-sectional studies*

| Section/Topic                | Item # | Recommendation                                                                                                                                                                       | Reported on page # |
|------------------------------|--------|--------------------------------------------------------------------------------------------------------------------------------------------------------------------------------------|--------------------|
| Title and abstract           | 1      | (a) Indicate the study's design with a commonly used term in the title or the abstract                                                                                               | 1                  |
|                              |        | (b) Provide in the abstract an informative and balanced summary of what was done and what was found                                                                                  | 2                  |
| <b>Introduction</b>          |        |                                                                                                                                                                                      |                    |
| Background/rationale         | 2      | Explain the scientific background and rationale for the investigation being reported                                                                                                 | 4-5                |
| Objectives                   | 3      | State specific objectives, including any prespecified hypotheses                                                                                                                     | 5                  |
| <b>Methods</b>               |        |                                                                                                                                                                                      |                    |
| Study design                 | 4      | Present key elements of study design early in the paper                                                                                                                              | 6                  |
| Setting                      | 5      | Describe the setting, locations, and relevant dates, including periods of recruitment, exposure, follow-up, and data collection                                                      | 6                  |
| Participants                 | 6      | (a) Give the eligibility criteria, and the sources and methods of selection of participants                                                                                          | 6<br>Figure 1      |
| Variables                    | 7      | Clearly define all <i>outcomes</i> , exposures, predictors, potential confounders, and effect modifiers. Give diagnostic criteria, if applicable                                     | 6                  |
| Data sources/<br>measurement | 8*     | For each variable of interest, give sources of data and details of methods of assessment (measurement). Describe comparability of assessment methods if there is more than one group | 6-7                |
| Bias                         | 9      | Describe any efforts to address potential sources of bias                                                                                                                            | 6                  |
| Study size                   | 10     | Explain how the study size was arrived at                                                                                                                                            | 6                  |
| Quantitative variables       | 11     | Explain how quantitative variables were handled in the analyses. If applicable, describe which groupings were chosen and why                                                         | 6-8                |
| Statistical methods          | 12     | (a) Describe all statistical methods, including those used to control for confounding                                                                                                | 7                  |
|                              |        | (b) Describe any methods used to examine subgroups and interactions                                                                                                                  | 8                  |
|                              |        | (c) Explain how missing data were addressed                                                                                                                                          | 7-8                |
|                              |        | (d) If applicable, describe analytical methods taking account of sampling strategy                                                                                                   | N/A                |
|                              |        | (e) Describe any sensitivity analyses                                                                                                                                                | 7                  |
| <b>Results</b>               |        |                                                                                                                                                                                      |                    |

|                          |     |                                                                                                                                                                                                               |           |
|--------------------------|-----|---------------------------------------------------------------------------------------------------------------------------------------------------------------------------------------------------------------|-----------|
| Participants             | 13* | (a) Report numbers of individuals at each stage of study—eg numbers potentially eligible, examined for eligibility, confirmed eligible, included in the study, completing follow-up, and analysed             | Figure 1  |
|                          |     | (b) Give reasons for non-participation at each stage                                                                                                                                                          | Figure 1  |
|                          |     | (c) Consider use of a flow diagram                                                                                                                                                                            | Figure 1  |
| Descriptive data         | 14* | (a) Give characteristics of study participants (eg demographic, clinical, social) and information on exposures and potential confounders                                                                      | 8         |
|                          |     | (b) Indicate number of participants with missing data for each variable of interest                                                                                                                           | Figure 1  |
| Outcome data             | 15* | Report numbers of outcome events or summary measures                                                                                                                                                          | 8-9       |
| Main results             | 16  | (a) Give unadjusted estimates and, if applicable, confounder-adjusted estimates and their precision (eg, 95% confidence interval). Make clear which confounders were adjusted for and why they were included. | 8-9       |
|                          |     | (b) Report category boundaries when continuous variables were categorized                                                                                                                                     | N/A       |
|                          |     | (c) If relevant, consider translating estimates of relative risk into absolute risk for a meaningful time period                                                                                              | N/A       |
| Other analyses           | 17  | Report other analyses done—eg analyses of subgroups and interactions, and sensitivity analyses                                                                                                                | 8-9       |
| <b>Discussion</b>        |     |                                                                                                                                                                                                               |           |
| Key results              | 18  | Summarise key results with reference to study objectives                                                                                                                                                      | 10        |
| Limitations              | 19  | Discuss limitations of the study, taking into account sources of potential bias or imprecision. Discuss both direction and magnitude of any potential bias                                                    | 13-14     |
| Interpretation           | 20  | Give a cautious overall interpretation of results considering objectives, limitations, multiplicity of analyses, results from similar studies, and other relevant evidence                                    | 11, 13-14 |
| Generalisability         | 21  | Discuss the generalisability (external validity) of the study results                                                                                                                                         | 14        |
| <b>Other information</b> |     |                                                                                                                                                                                                               |           |
| Funding                  | 22  | Give the source of funding and the role of the funders for the present study and, if applicable, for the original study on which the present article is based                                                 | 1         |

\*Give information separately for cases and controls in case-control studies and, if applicable, for exposed and unexposed groups in cohort and cross-sectional studies.

**Note:** An Explanation and Elaboration article discusses each checklist item and gives methodological background and published examples of transparent reporting. The STROBE checklist is best used in conjunction with this article (freely available on the Web sites of PLoS Medicine at <http://www.plosmedicine.org/>, Annals of Internal Medicine at <http://www.annals.org/>, and Epidemiology at <http://www.epidem.com/>). Information on the STROBE Initiative is available at [www.strobe-statement.org](http://www.strobe-statement.org).



# BMJ Open

## A Cross-Sectional Study Measuring Vanadium and Chromium Levels in Paediatric CKD Patients

|                                 |                                                                                                                                                                                                                                                                                                                                                                                                                                                                                                                                                                |
|---------------------------------|----------------------------------------------------------------------------------------------------------------------------------------------------------------------------------------------------------------------------------------------------------------------------------------------------------------------------------------------------------------------------------------------------------------------------------------------------------------------------------------------------------------------------------------------------------------|
| Journal:                        | <i>BMJ Open</i>                                                                                                                                                                                                                                                                                                                                                                                                                                                                                                                                                |
| Manuscript ID                   | bmjopen-2016-014821.R1                                                                                                                                                                                                                                                                                                                                                                                                                                                                                                                                         |
| Article Type:                   | Research                                                                                                                                                                                                                                                                                                                                                                                                                                                                                                                                                       |
| Date Submitted by the Author:   | 08-Jan-2017                                                                                                                                                                                                                                                                                                                                                                                                                                                                                                                                                    |
| Complete List of Authors:       | Filler, Guido; London Health Sciences Centre Children's Hospital, Paediatrics; Western University, Paediatrics<br>Kobrzynski, Marta; London Health Sciences Centre Children's Hospital, Paediatrics<br>Sidhu, Hargun; London Health Sciences Centre Children's Hospital, Paediatrics<br>Belostotsky, Vladimir; Hamilton Health Sciences, Paediatrics<br>Huang, Shih-Han; London Health Sciences Centre, Nephrology<br>McIntyre, CW; University of Western Ontario, Division of Nephrology<br>Yang, Liju; Western University, Pathology and Laboratory Medicine |
| <b>Primary Subject Heading</b>: | Renal medicine                                                                                                                                                                                                                                                                                                                                                                                                                                                                                                                                                 |
| Secondary Subject Heading:      | Paediatrics, Public health                                                                                                                                                                                                                                                                                                                                                                                                                                                                                                                                     |
| Keywords:                       | Paediatric nephrology < PAEDIATRICS, PUBLIC HEALTH, TOXICOLOGY, Chronic renal failure < NEPHROLOGY, Environmental Impact on Health                                                                                                                                                                                                                                                                                                                                                                                                                             |
|                                 |                                                                                                                                                                                                                                                                                                                                                                                                                                                                                                                                                                |

SCHOLARONE™  
Manuscripts

only

## A Cross-Sectional Study Measuring Vanadium and Chromium Levels in Paediatric CKD Patients

Guido Filler<sup>1\*§</sup>, MD, PhD, FRCPC, Marta Kobrzynski<sup>1\*</sup> BSc., Hargun Kaur Sidhu<sup>1</sup>,  
Vladimir Belostotsky<sup>2</sup>, MD, PhD, FRCPC (UK), Shih-Han S Huang<sup>1\*\*</sup>, MD, FRCPC,  
Chris McIntyre<sup>1\*\*</sup>, MD, PhD, Liju Yang<sup>§</sup>, PhD

**Affiliations:** <sup>1</sup>Department of Paediatrics, Division of Paediatric Nephrology, Children's Hospital, \*Lilbeth Caberto Kidney Clinical Research Unit, London Health Sciences Centre, and Departments of \*Medicine, Division of Nephrology, and <sup>§</sup>Pathology and Laboratory Medicine, Schulich School of Medicine & Dentistry, University of Western Ontario, London, Ontario, Canada; and <sup>2</sup>Department of Paediatrics, Division of Paediatric Nephrology, McMaster Children's Hospital, Hamilton, Ontario, Canada

**Address correspondence to:** Dr. Guido Filler, Professor of Paediatrics, Medicine and Pathology & Laboratory Medicine, Children's Hospital, London Health Sciences Centre, University of Western Ontario, 800 Commissioners Road East, Rm B1-138A, London ON, Canada, N6A 5W9, guido.filler@lhsc.on.ca, +1-519-685-8377

**Short title:** Vanadium in CKD

**Funding Source:** This study was supported through funding from Hamilton Health Sciences in the form of a New Investigator Fund Award (NIF13312) awarded to Dr. Vladimir Belostotsky.

**Financial Disclosure:** The authors have no financial relationships relevant to this article to disclose.

**Conflict of Interest:** The authors have no conflicts of interest relevant to this article to disclose.

**Clinical Trial Registration:** clinicaltrials.gov, NCT02126293,  
<https://clinicaltrials.gov/ct2/show/NCT02126293>

**Abbreviations:** Vanadium (V), Chromium (Cr), International Agency for Research on Cancer (IARC), chronic kidney disease (CKD), High Resolution Sector Field Inductively Coupled Mass Spectrometry (HR-SF-ICP-MS), Centers for Disease Control (CDC).

Word Count: Abstract: 281; Manuscript: 3,104

## Abstract

**Objectives:** Although many secondary effects of high levels of vanadium (V) and chromium (Cr) overlap with symptoms seen in paediatric patients with chronic kidney disease (CKD), their plasma V and Cr levels are understudied.

**Design:** Ancillary cross-sectional study to a prospective longitudinal randomized controlled trial.

**Setting:** Children's Hospital of Western Ontario, London Health Sciences Centre, London, Ontario, Canada.

**Participants:** 36 children and adolescents 4-18 years of age with CKD.

**Interventions:** 1-6 trace element measurements per patient. Cystatin C (CysC) estimated glomerular filtration rate (eGFR) was calculated using the Filler formula. Plasma V and Cr levels were measured using HR-SF-ICP-MS. Anthropomorphic data and blood parameters were collected from our electronic chart program. Water Cr and V data were obtained from the Ontario Water (Stream) Quality Monitoring Network.

**Primary and Secondary Outcome Measures:** Primary outcomes: Plasma Cr and V. Secondary outcomes: Age, season, CysC, CysC eGFR, and Cr and V levels in environmental water.

**Results:** Median (IQR) eGFR was 51 mL/min/1.73 m<sup>2</sup> (35, 75). The median V level was 0.12 µg/L (0.09, 0.18), which was significantly greater than the 97.5th percentile of the reference interval of 0.088 µg/L; 32 patients had at least one set of V levels above the published reference interval. The median Cr level was 0.43 µg/L (0.36, 0.54), which was also significantly greater than the established reference interval; 34 had at least one set of Cr levels above the published reference interval. V and Cr levels were moderately correlated. Only some patients had high environmental exposure.

**Conclusions:** Our study suggests that paediatric patients with CKD have elevated plasma levels of V and Cr. This may be the result of both environmental exposure and a low eGFR. It may be necessary to monitor V and Cr levels in patients with an eGFR < 30 mL/min/1.73m<sup>2</sup>.

**Trial Registration:** NCT02126293; HC #172241

### Strengths and Limitations of the Study

- This is the first study to examine V and Cr in children with CKD.
- Our study has a strong cross-sectional design in combination with longitudinal data and a reasonable number of patients for a paediatric study. The instruments used to measure the trace elements are highly precise.
- Our study links publicly-available data measuring trace elements in drinking water to detailed descriptions of patients to differentiate environmental and CKD-related accumulation of V and Cr.
- More subjects would have lead to more precise data, and our patient cohort has a bias towards milder CKD stages. We did not control for fluid or food intake.
- There are no detailed studies on the age dependency of paediatric V and Cr concentrations.

## Introduction

Vanadium (V, atomic number 23) and chromium (Cr, atomic number 24) are located beside each other on the periodic table and share many points of similarity. Both are predominantly excreted by the kidneys,<sup>1 2</sup> are associated with normal human health and with the pathogenesis of several diseases (i.e. essential and toxic),<sup>3-6</sup> and occur naturally in our surrounding environment.<sup>7 8</sup> Metallic V and Cr do not occur in nature and are instead found as compounds in different valence states.<sup>8-10</sup> Humans can be exposed to V and Cr through the air, but the majority of contact stems from food and water.<sup>7 8 11</sup> They are usually present in low, harmless concentrations in various foods (particularly seafood for V).<sup>1</sup> Some nutritional supplements and vitamins also contain V, whose levels can exceed healthy levels.<sup>4 11</sup>

The principle pentavalent form of V can easily enter a cell via phosphate and sulphate ion channels, rendering this version of V very toxic.<sup>12</sup> V also interferes with phosphate-containing enzymes<sup>3 4</sup> and can activate several genes and participate in the inflammatory response. The highest initial concentrations of V are found in the kidneys, liver, and lungs, and in the long-term, it is stored in the bones and muscles.<sup>13 14</sup> The effects of V on human health are largely dependent on the type of compound,<sup>11</sup> dose, duration, and route of exposure.<sup>3 4 11</sup> The common hexavalent form of Cr easily enters cells through facilitated uptake, which is more efficient than the simple diffusion used to take up the trivalent form. Free radicals are created in cells when Cr (VI) is reduced to Cr (III).<sup>8</sup> It is distributed to and accumulated by the erythrocyte and the highest concentrations of Cr are found in the kidneys and liver. The absorption fraction of ingested Cr is higher when dietary intakes are lower. The major route of elimination of absorbed Cr is through the urine, with unabsorbed Cr recovered in the faeces,<sup>2</sup> while V is also mostly excreted through the urine, with some excretion in the faeces.<sup>15</sup>

1  
2  
3 V has many systemic effects, including gastrointestinal, respiratory, haematological,  
4 immunological, and cardiovascular effects.<sup>1 7 16 17</sup> The International Agency for Research on  
5  
6 Cancer (IARC) has classified V pentoxide as “possibly carcinogenic.” Other data also suggest  
7  
8 the potential of V to induce developmental effects in humans. It is unknown whether children are  
9  
10 affected by V-containing compounds in the same ways as adults.<sup>11</sup>  
11  
12

13  
14  
15 The IARC has classified Cr as carcinogenic. Inhalation has been shown to cause lung cancer in  
16  
17 humans, and exposure has been shown to cause tumours in the stomach, intestinal tract, and  
18  
19 lungs in animals.<sup>8</sup> Depending on the route of exposure, trivalent and hexavalent Cr are also  
20  
21 associated with gastrointestinal, immunological, haematological (including anaemia),  
22  
23 reproductive, developmental, and other serious effects. Hexavalent Cr is more toxic than its  
24  
25 trivalent form, but trace element measurements rarely differentiate between the two.  
26  
27  
28

29  
30  
31 The danger V and particularly Cr pose to our health are made clear when the serious systemic  
32  
33 effects associated with either acute or chronic exposure to either element in humans are explored  
34  
35 in greater depth.  
36  
37

38  
39 Acute oral exposure to V can cause mild gastrointestinal irritation such as stomach cramps, mild  
40  
41 diarrhoea, and nausea.<sup>7</sup> Although there are no studies examining the effect of chronic oral  
42  
43 exposure to V on human health, chronic exposure to V through inhalation may cause  
44  
45 neurocognitive deficits and may impair neurobehavioral abilities, symptoms which are regularly  
46  
47 seen in paediatric CKD patients.<sup>18</sup> Chronic exposure to V through inhalation has also been  
48  
49 shown to cause immunological effects such as significant decreases in lymphocyte stimulation  
50  
51 and an increase in the incidence of viral and bacterial respiratory infections in children, a  
52  
53 vulnerable population.<sup>16</sup> Another study examining the health effects of chronically inhaling V  
54  
55  
56  
57  
58  
59  
60

1  
2  
3 found a significant association between V and systolic blood pressure and pulse pressure in an  
4 elderly population.<sup>17</sup>  
5  
6  
7

8  
9 Cr appears even more toxic; acute oral exposure has been linked to (i) death, and at lethal doses  
10 respiratory effects such as pleural effusions, pulmonary oedema, bronchitis, and  
11 bronchopneumonia; (ii) cardiovascular effects such as cardiopulmonary arrest, cardiac arrest, and  
12 a drop in cardiac output, heart rate and blood pressure; (iii) gastrointestinal haemorrhage and  
13 necrosis, abdominal pain and vomiting; (iv) haematological effects such as inhibited coagulation;  
14 (v) hepatic effects such as the development of jaundice, fatty degeneration, hepatic necrosis, and  
15 increased bilirubin, serum lactic dehydrogenase, alanine and aspartate aminotransferase, and  $\gamma$ -  
16 glutamyl transferase; and (vi) renal effects such as renal failure characterized by proteinuria,  
17 haematuria and anuria, renal necrosis, necrosis and swelling of renal tubules, oliguria, and  
18 destruction of the tubular epithelium of the kidneys, highly elevated serum creatinine and blood  
19 urea nitrogen; and (vii) metabolic acidosis.<sup>8</sup> Two studies in particular have shown the effects of  
20 chronic oral exposure to Cr(VI). Both studies are exceptionally relevant to our study and  
21 consisted of populations who had Cr(VI)-contaminated drinking water. The first study, from an  
22 area near a ferrochromium production plant in the Liaoning Province in China, found an  
23 association between contaminated water and gastrointestinal effects such as oral ulcers,  
24 diarrhoea, abdominal pain, indigestion, and an increased incidence of lung and stomach cancer.<sup>8</sup>  
25  
26  
27  
28  
29  
30  
31  
32  
33  
34  
35  
36  
37  
38  
39  
40  
41  
42  
43  
44  
45  
46  
47  
48  
49  
50  
51  
52  
53  
54  
55  
56  
57  
58  
59  
60  
19 The second study, from an area of Greece with elevated Cr(VI) in the public drinking water,  
found significantly higher standardized mortality ratios for primary liver, lung, kidney, and  
genitourinary cancer.<sup>8 20</sup>

Several studies show that the serum concentrations of V and Cr are higher in adult haemodialysis  
patients and chronic kidney disease (CKD) patients; this suggests that they accumulate in the

1  
2  
3 body.<sup>5 21-23</sup> Another study confirmed this association by measuring trace elements in the hair of  
4  
5 adult haemodialysis patients.<sup>6</sup> Although data in paediatric CKD patients are elusive, we  
6  
7 hypothesized that similar to dialysis patients, we would find elevated V and Cr levels in  
8  
9 paediatric CKD patients who were not receiving dialysis treatments.<sup>24</sup> We also hypothesized that  
10  
11 levels would increase with worsening glomerular filtration rate (GFR).  
12  
13  
14

## 15 16 17 **Patients and Methods**

### 18 19 20 STUDY DESIGN

21  
22 The study adhered to the Declaration of Helsinki. The Research Ethics Board of the University  
23  
24 of Western Ontario approved the study as part of an intervention study on zinc supplementation  
25  
26 in CKD patients centred at McMaster University (NCT02126293; HC #172241; REB #104976).  
27  
28 Patients were recruited from April 2014 to April 2016. Given that almost all patients enrolled  
29  
30 within the first 3 months had elevated V and Cr levels, we created this ancillary cross-sectional  
31  
32 study to specifically analyze the elevated trace elements in this population. The primary outcome  
33  
34 of the original study was patient plasma zinc levels, while the secondary outcomes were the  
35  
36 patient plasma trace element levels.  
37  
38  
39  
40  
41

### 42 STUDY POPULATION

43  
44 See Figure 1 for inclusion and exclusion criteria. We performed an interim analysis on 36 study  
45  
46 patients (16 female, 44%; average age  $11.85 \pm 4.5$  years, age range 4.42-18.98 years) with  
47  
48 various renal pathologies and diagnosed CKD (as per the KDIGO guidelines<sup>25</sup>) using the  
49  
50 modified Schwartz formula<sup>26</sup> at the London Health Sciences Centre, a tertiary paediatric  
51  
52 nephrology centre. Patients with Stage 1 ( $eGFR > 90$  mL/min/1.73 m<sup>2</sup>) to Stage 5 ( $<15$   
53  
54 mL/min/1.73 m<sup>2</sup>) CKD were included in the study. Patients receiving dialysis treatments were  
55  
56  
57  
58  
59  
60



1  
2  
3 excluded from the study because the dialysis water could further affect the patients' V and Cr  
4 levels. Since this was an ancillary study, the study did not specifically select for the stage of  
5  
6  
7  
8 CKD, the patient's age, or the location of the patient's residence, which could introduce potential  
9  
10 bias. Patients also had different numbers of repeated samples, depending on their clinic visits.  
11  
12 Patients did not record their fluid or food intake, which could influence the results. To address  
13  
14 potential bias due to contaminated drinking water, we matched the postal code of the patient's  
15  
16 home with provincial 2014 water quality data.  
17  
18  
19

## 20 21 EXPERIMENTAL METHODS

22  
23 eGFR was calculated using the Filler formula,<sup>27</sup> using the new international reference  
24  
25 materials.<sup>28</sup> Plasma samples were collected in BD K<sub>2</sub>-EDTA Royal Blue Vacutainer tubes  
26  
27 (Reference #368381). V and Cr levels were measured using High Resolution Sector Field  
28  
29 Inductively Coupled Mass Spectrometry (HR-SF-ICP-MS;  
30  
31 [https://ltig.lhsc.on.ca/?action=view\\_rec&test=Vanadium%2C%20Plasma](https://ltig.lhsc.on.ca/?action=view_rec&test=Vanadium%2C%20Plasma;);  
32  
33 [https://ltig.lhsc.on.ca/?action=view\\_rec&test=Chromium%2CPlasma](https://ltig.lhsc.on.ca/?action=view_rec&test=Chromium%2CPlasma); last accessed 27-Jun-  
34  
35 2016). Total imprecision (CV) of the V measurements was 10% at low concentration (0.100  
36  
37 µg/L), 4% at medium concentration (0.257 µg/L), and 8% at high concentration (0.356 µg/L).  
38  
39 For Cr, the total imprecision (CV) was 3% (0.82 µg/L), 4% (5.40 µg/L) and 5% (43.60 µg/L),  
40  
41 respectively. Anthropomorphic data (patient height measured by stadiometer, necessary to  
42  
43 calculate the Schwartz eGFR), the first three digits of patients' postal codes, and creatinine and  
44  
45 cystatin C were collected from our electronic chart program, PowerChart (Cerner). Data were  
46  
47 entered into an Excel spread sheet (Excel for Mac 2011, version 14.4.4.).  
48  
49  
50  
51  
52  
53

54  
55 Data analysis was performed using GraphPad Prism 5 for Mac OS X, version 5.0f, and HLM  
56  
57 7.01, Scientific Software International, Inc., Skokie, IL, USA. Data were analysed for normal  
58  
59  
60

1  
2  
3 distribution using the D'Agostino & Pearson omnibus normality test. As most data were  
4 normally distributed, parametric methods were used for all statistical tests, with the exception of  
5  
6 the V and Cr levels and estimated glomerular filtration rate (eGFR), which were expressed as  
7  
8 median and interquartile range (25<sup>th</sup>, 75<sup>th</sup> percentile). Spearman's rank correlation analysis was  
9  
10 used to analyse the correlation analysis of V levels that were not normally distributed. The  
11  
12 Wilcoxon Signed Rank test was used to compare the V and Cr levels with the 97.5<sup>th</sup> percentile as  
13  
14 neither V nor Cr levels were normally distributed. A repeated measures analysis was conducted  
15  
16 to determine whether the results of repeated measurements (from the same day) affected the  
17  
18 original results.  
19  
20  
21  
22  
23

24  
25 Heat maps depicting V and Cr levels in drinking water were generated using data collected by  
26  
27 the Government of Ontario for their Provincial (Stream) Water Quality Monitoring Network,  
28  
29 which can found at [https://www.ontario.ca/data/provincial-stream-water-quality-monitoring-](https://www.ontario.ca/data/provincial-stream-water-quality-monitoring-network)  
30  
31 network. Only the most recent data were used (2014,  
32  
33 [https://files.ontario.ca/moe\\_mapping/downloads/2Water/PWQMN\\_by\\_year/pwqmn\\_rawdata\\_20](https://files.ontario.ca/moe_mapping/downloads/2Water/PWQMN_by_year/pwqmn_rawdata_2014.xlsx)  
34  
35 14.xlsx). The station coordinate data (found at  
36  
37 [https://files.ontario.ca/moe\\_mapping/downloads/2Water/PWQMN1.xlsx](https://files.ontario.ca/moe_mapping/downloads/2Water/PWQMN1.xlsx)) was used to determine  
38  
39 the longitude and latitude of each testing station in order to generate the map. Since each station  
40  
41 had a varying number of results, only the most recent measurement was used, unless that  
42  
43 measurement was a negative number, in which case the second most recent measurement was  
44  
45 used. Measurements used in the maps were taken between spring and winter of 2014. The V or  
46  
47 Cr measurement at each station and the longitude and latitude of each station were then uploaded  
48  
49 in two separate files to open source mapping software created by Pete Warden, which can be  
50  
51  
52  
53  
54  
55  
56  
57  
58  
59  
60

1  
2  
3 found at [www.openheatmap.com](http://www.openheatmap.com). Patients' locations in Southern Ontario were mapped using the  
4  
5 first three digits of their postal codes (data on file).  
6  
7

## 8 9 **Results**

10  
11 Thirty-six children and adolescents with CKD and at least one set of trace element data were  
12 included in the study (Figure 1, Table 1). Median eGFR was 51 mL/min/1.73 m<sup>2</sup> (35, 75). V  
13 levels were not normally distributed (D'Agostino & Pearson omnibus test p-value <0.0001). The  
14 median V level was 0.12 µg/L (0.09, 0.18) and the maximum V level was 3.350 µg/L. Thirty-two  
15 patients had at least one set of V levels above the published reference interval of 0.088 µg/L  
16 (Table 2) in either unit, and the results of 75 of the 94 total tests (80%) were above the interval.  
17 The V levels were significantly greater than the 97.5<sup>th</sup> percentile of the reference interval of  
18 0.088 µg/L (Wilcoxon Signed Rank test p<0.0001). There was a weak negative correlation  
19 between the V levels and the eGFR (Spearman r=-0.1209, Figure 2). In patients with repeated V  
20 levels, there was no statistically significant change between the first and the last measured level  
21 (Figure 3).  
22  
23  
24  
25  
26  
27  
28  
29  
30  
31  
32  
33  
34  
35  
36  
37  
38

39 Cr levels were not normally distributed (D'Agostini & Pearson omnibus test p-value <0.0001).  
40 The median Cr level was 0.43 µg/L (0.36, 0.54), which was significantly greater than the 97.5<sup>th</sup>  
41 percentile of the reference interval of 0.31µg/L (Wilcoxon Signed Rank test p<0.0001). Thirty-  
42 four patients had at least one Cr level that was above the reference interval for healthy adults (77  
43 of 94 tests [82%]). There was a very weak non-significant positive correlation between Cr and  
44 eGFR (Spearman r=0.09111, p=0.3851, Figure 4). The median level did not change from first to  
45 last measurement, and the perceived rise in the values was not statistically significant (p=0.3381,  
46 Wilcoxon matched-pairs signed rank test, Figure 5). There was a moderate but significant  
47  
48  
49  
50  
51  
52  
53  
54  
55  
56  
57  
58  
59  
60

1  
2  
3 correlation between V and Cr levels (Spearman  $r=0.5973$ ,  $p<0.0001$ ). Similar results were  
4  
5 found with a repeated measures analysis (HLM 7.01, Scientific Software International, Inc.,  
6  
7 Skokie, IL, USA) that accounted for all measurement points. Neither V nor Cr levels were  
8  
9 associated with age or season.  
10  
11

12  
13 The V levels measured in water ranged from 0.00257  $\mu\text{g/L}$  to 5.87  $\mu\text{g/L}$ , and the measured Cr  
14  
15 levels in water ranged from 0.0099  $\mu\text{g/L}$  to 4.32  $\mu\text{g/L}$ . The mapped V data shows higher  
16  
17 concentrations grouped along the Detroit and Saint Clair Rivers as well as the shores around  
18  
19 Lake Erie and Lake Huron (Figure 6). The mapped Cr levels show the same general distribution  
20  
21 pattern but with slightly larger values overall (Figure 7).  
22  
23

24  
25 Comparing the two maps to a map of the patients' locations from the study, we found that  
26  
27 although some groupings of patients corresponded to the areas of high V and Cr (such as  
28  
29 Windsor, St. Thomas, Hanover, and Owen Sound,  $n=8$ ), others were located in areas of low  
30  
31 concentrations.  
32  
33

## 34 35 36 **Discussion**

37  
38 Our study demonstrates a high prevalence of elevated V and Cr levels in paediatric CKD  
39  
40 patients. With V, this trend is strongest in patients with an eGFR of less than 30 mL/min/1.73  
41  
42  $\text{m}^2$ . In 28 of the 36 patients, V and Cr exposure in drinking water did not seem to be the major  
43  
44 contributing factor.  
45  
46  
47

48  
49 Homeostasis of both trace elements depends on uptake and elimination. Uptake occurs through  
50  
51 different types of environmental exposures, namely through the air, water, food, and soil. More  
52  
53 than 70% of Cr in the environment comes from anthropogenic sources, such as non-ferrous base  
54  
55 metal smelters, refineries, leather tanning industries, urban storm water runoff, effluent streams  
56  
57  
58  
59  
60

1  
2  
3 from pulp and paper mills and discharges from thermal generating stations.<sup>29</sup> In Canada, it is  
4 largely released into the atmosphere through different means of pollution, namely industrial  
5 processes (1/3), stationary fuel consumption (1/2), and transportation (3/20).<sup>30</sup> Ground water and  
6 other fresh water contain V (in the form of  $\text{H}_2\text{VO}_4^-$ ) at an approximate concentration of 1.17  
7  $\mu\text{g/L}$ , fats, fruits, and vegetables at 1-5  $\mu\text{g/kg}$ , and meat, seafood, whole grains, and dairy  
8 products at 5-30  $\mu\text{g/kg}$ .<sup>31</sup> The daily intake via food is usually between 10-200  $\mu\text{g}$ .<sup>32</sup> Cr (III), the  
9 less toxic isoform of Cr, is also naturally found in many foods.<sup>8</sup> Both hexavalent and trivalent Cr  
10 are found in water.<sup>29</sup>

11  
12 Although previous studies have shown elevated V and Cr levels in adult dialysis patients,<sup>22</sup> we  
13 are unaware of any published work showing high V and Cr levels in paediatric CKD patients  
14 other than in abstract form.<sup>33</sup> Since CKD patients are usually polyuric and develop polydipsia,  
15 their exposure to V in drinking water is several-fold greater than the general population.  
16 Combined with the fact that V is mainly eliminated through the kidneys,<sup>1 3</sup> this vulnerable  
17 population's environmental exposure to toxic trace elements may pose a danger, especially if  
18 they have polyuria and polydipsia and drink contaminated water. We suspect that in addition to  
19 our patients' low V and Cr clearance, their significantly greater exposure to V and Cr in drinking  
20 water is the reason for their high levels of both elements. Since some groupings of patients  
21 corresponded to the areas of high V and Cr and others did not, this leads us to believe that our  
22 findings are the result of both environmental factors and impaired kidney function.

23  
24 There are few guidelines for maximum V concentrations in the environment, and those that exist  
25 either cover a wide range from different sources, are outdated, or were determined using  
26 extremely limited and unacceptable methodologies.<sup>34</sup> The Office of Environmental Health  
27 Hazard Assessment in California released a statement in August of 2000 in response to the  
28  
29  
30  
31  
32  
33  
34  
35  
36  
37  
38  
39  
40  
41  
42  
43  
44  
45  
46  
47  
48  
49  
50  
51  
52  
53  
54  
55  
56  
57  
58  
59  
60

1  
2  
3 Department of Health Service's proposed level not exceeding 50 µg/L, recommending a lower  
4  
5 level of 15 µg/L.<sup>35</sup> Meanwhile, Environment Canada released Federal Environmental Quality  
6  
7 Guidelines for V in May of 2016, listing the predicted no-effect concentration for marine water  
8  
9 at 5 µg/L and for freshwater at 120 µg/L. The Canadian federal government does not include V  
10  
11 in their most recent Guidelines for Canadian Drinking Water Quality (2014),<sup>36</sup> nor is it included  
12  
13 in the water quality guidelines used by Ontario.<sup>37</sup> Other Canadian water quality guidelines list  
14  
15 standards ranging from 3.9 to 250 µg/L.<sup>38 39</sup> The standard for Cr in Ontario drinking water is 50  
16  
17 µg/L. The Centers for Disease Control (CDC) has established some minimal risk levels (MRLs)  
18  
19 for humans, defined as an estimate of daily human exposure to V and Cr that is likely to be  
20  
21 without an appreciable risk of adverse effects over a specified duration of exposure.<sup>7</sup> These  
22  
23 limits are as follows: oral acute (none), intermediate-duration (10 µg/kg/day for V and 0.5  
24  
25 µg/kg/day), and chronic-duration (none for V and 0.9 µg/kg/day for Cr).  
26  
27  
28  
29  
30  
31

32 The average concentration of Cr in uncontaminated surface and marine water is generally below  
33  
34 1.0 µg/L,<sup>30</sup> but in Ontario these numbers can be much greater at sites most severely affected by  
35  
36 pollution. This includes the St. Marys River system with concentrations of 31 000 µg/g dry  
37  
38 weight (d.w.) in Tannery Bay and concentrations exceeding 5120 µg/g (d.w.) in the Welland  
39  
40 River downstream from a steel manufacturing plant compared to 10 µg/g (d.w.) upstream.<sup>30</sup> Up  
41  
42 to 1920 µg/g (d.w.) has been found in Detroit River sediments and 564 µg/g (d.w.) in Hamilton  
43  
44 Harbour sediments.<sup>6</sup> Elevated concentrations of two- to four-fold above local background levels  
45  
46 have also been reported in sediments from Lake Simcoe, the Detroit River, Lake Ontario off the  
47  
48 Niagara River and the St. Lawrence River.<sup>32</sup> Our catchment area overlaps with several of these  
49  
50 areas.  
51  
52  
53  
54  
55  
56  
57  
58  
59  
60

1  
2  
3 Twenty-eight of our patients were not from the highly polluted areas. However, some of the  
4  
5 highest V and Cr levels were observed in patients with a low GFR, despite living in areas with  
6  
7 low V and Cr exposure. We believe that the high water intake with CKD and the low GFR are  
8  
9 two additional factors that result in the high prevalence of elevated V and Cr in these patients.  
10  
11

12  
13 Clearly, the scientific evidence indicating both the safe levels and the resultant toxicity of V in  
14  
15 our air, water, and food is lacking, of poor quality, and conflicting, especially considering how  
16  
17 little, if any, of this research has been done on i) vulnerable populations such as children and ii)  
18  
19 children with impaired renal or hepatic function. The guidelines for Cr are slightly clearer  
20  
21 considering its increased toxicity, but there are still little data on chronic safe levels and toxicity.  
22  
23 Since high V and Cr levels are seen in such a large proportion of our study population, and since  
24  
25 the environmental levels of V and Cr and the resultant health implications are mostly unknown,  
26  
27 the question becomes: how can we limit the exposure of children with poor renal function to  
28  
29 these potentially toxic trace elements?  
30  
31  
32  
33  
34

35  
36 Several studies have shown the potential of chelating agents such as tiron in reducing V body  
37  
38 burden and toxicity.<sup>7</sup> The safety and efficacy of this strategy has not been established in children.  
39  
40 Therefore, preventing high exposure may be the only feasible strategy, but using bottled water  
41  
42 with low trace element levels may be very costly.  
43  
44

45  
46 A strength of our study is its cross-sectional design in combination with longitudinal data and a  
47  
48 reasonable number of patients for a paediatric pilot study. Another strength is the high precision  
49  
50 of the instruments used to measure the trace elements. There are still several limitations. More  
51  
52 subjects would have lead to more precise data, and our patient cohort has a bias towards milder  
53  
54 CKD stages, which could have potentially minimized the trace element levels seen in this  
55  
56  
57  
58  
59  
60

1  
2  
3 population. Additionally, although the reference intervals that we used were specific to our  
4  
5 catchment area and to the equipment used to measure plasma trace elements at our site, they are  
6  
7 based on a cohort of adults and have not been published. We did not assess whether the patients  
8  
9 drink municipal water, well water or bottled water (with presumably lower concentrations) nor  
10  
11 did we assess their total fluid intake. We also did not control for food intake. Certain foods such  
12  
13 as fish, shellfish<sup>40</sup> and grains and cereals<sup>41</sup> may contain dangerous V concentrations. These  
14  
15 potential confounders could have minimized the environmental impact of the high levels in this  
16  
17 population. Finally, detailed studies on the age dependency of paediatric V and Cr concentrations  
18  
19 are elusive. Additionally, the tubulotoxicity of Cr, in particular, may influence the progression of  
20  
21 CKD. Although we did not examine the tubulotoxicity found in our patient cohort, there is often  
22  
23 mixed tubular and glomerular proteinuria in CKD patients and proximal tubular dysfunction in  
24  
25 CKD.<sup>42</sup> Some recent research in animal models has suggested that selenium supplementation  
26  
27 could reverse some of the tubular damage.<sup>43</sup> Of course, haematopoiesis is impaired in the  
28  
29 advanced stages of CKD and nephrotoxicity should be avoided.  
30  
31  
32  
33  
34  
35

36  
37 Despite these limitations, our data robustly demonstrate a high prevalence of elevated V and Cr  
38  
39 levels in children with CKD. There was a trend toward higher V levels with worsening kidney  
40  
41 function. Our data would favour monitoring V and Cr in paediatric CKD patients, especially in  
42  
43 areas with high exposures or in very polyuric patients.  
44  
45  
46

### 47 **Acknowledgements**

48  
49  
50 The authors would like to thank Mrs. Maria McCann and Mr. Colin Bradley for their outstanding  
51  
52 commitment to the highest level of performance with regard to measuring the trace elements on  
53  
54 MS/MS at the Trace Element Laboratory at the London Health Sciences Centre. We would also  
55  
56  
57  
58  
59  
60



1  
2  
3 like to thank Michael Miller, PhD, for helping our team by analysing all of the data using a  
4  
5 repeated measures analysis.  
6  
7  
8  
9  
10  
11  
12  
13  
14  
15  
16  
17  
18  
19  
20  
21  
22  
23  
24  
25  
26  
27  
28  
29  
30  
31  
32  
33  
34  
35  
36  
37  
38  
39  
40  
41  
42  
43  
44  
45  
46  
47  
48  
49  
50  
51  
52  
53  
54  
55  
56  
57  
58  
59  
60

For peer review only

## References

1. Heinemann G, Fichtl B, Vogt W. Pharmacokinetics of vanadium in humans after intravenous administration of a vanadium containing albumin solution. *Br J Clin Pharmacol* 2003;55(3):241-5. [published Online First: 2003/03/13]
2. Organization WH. Chromium in Drinking-water Geneva2003 [Available from: [http://www.who.int/water\\_sanitation\\_health/dwq/chemicals/chromium.pdf](http://www.who.int/water_sanitation_health/dwq/chemicals/chromium.pdf) accessed July 13 2016.
3. Mukherjee B, Patra B, Mahapatra S, et al. Vanadium--an element of atypical biological significance. *Toxicol Lett* 2004;150(2):135-43. doi: 10.1016/j.toxlet.2004.01.009
4. Gruzewska K, Michno A, Pawelczyk T, et al. Essentiality and toxicity of vanadium supplements in health and pathology. *J Physiol Pharmacol* 2014;65(5):603-11.
5. Hosokawa S, Yamaguchi O, Yoshida O. Vanadium transfer during haemodialysis. *Int Urol Nephrol* 1991;23(4):407-9.
6. Ochi A, Ishimura E, Tsujimoto Y, et al. Trace elements in the hair of hemodialysis patients. *Biol Trace Elem Res* 2011;143(2):825-34. doi: 10.1007/s12011-010-8948-y
7. Services USDoHaH. Toxicological Profile for Vanadium United States: United States Government; September 2012 [Available from: <http://www.atsdr.cdc.gov/ToxProfiles/tp58.pdf> accessed July 11 2016.
8. Services USDoHaH. Toxicological Profile for Chromium United States: United States Government; September 2012 [Available from: <http://www.atsdr.cdc.gov/ToxProfiles/tp7.pdf> accessed July 11 2016.
9. Lagerkvist B, Nordberg, G.F., Vouk, V. Vanadium. Handbook on the toxicology of metals. 2 ed. Amsterdam: Elsevier Science Publishers 1986.
10. Barceloux DG. Vanadium. *J Toxicol Clin Toxicol* 1999;37(2):265-78.
11. cite? T--ht. ToxGuide for Vanadium V. In: Services UDOHaH, ed., 2012.
12. Rehder D. Biological and medicinal aspects of vanadium. *Inorg Chem Commun* 2003(6):604-17.
13. Organization WH. Trace elements in human nutrition and health. Geneva: WHO 1996.
14. Crebelli R, Leopardi P. Long-term risks of metal contaminants in drinking water: a critical appraisal of guideline values for arsenic and vanadium. *Annali dell'Istituto superiore di sanita* 2012;48(4):354-61. doi: DOI: 10.4415/ANN\_12\_04\_03 [published Online First: 2012/12/19]
15. Europe WHOROf. Chapter 6.12: Vanadium 2000 [Available from: [http://www.who.int/water\\_sanitation\\_health/dwq/chemicals/chromium.pdf](http://www.who.int/water_sanitation_health/dwq/chemicals/chromium.pdf) accessed July 21 2016.
16. Lener J. KJ, Kodl M., et al. Health effects of environmental exposure to vanadium. Vanadium in the environment Part 2: Health Effects. New York, NY: John Wiley & Sons 1998:1-19.
17. Jacobs L, Buczynska A, Walgraeve C, et al. Acute changes in pulse pressure in relation to constituents of particulate air pollution in elderly persons. *Environ Res* 2012;117:60-7. doi: 10.1016/j.envres.2012.05.003
18. Barth A, Schaffer AW, Konnaris C, et al. Neurobehavioral effects of vanadium. *Journal of toxicology and environmental health Part A* 2002;65(9):677-83. doi: 10.1080/15287390252900377 [published Online First: 2002/05/09]

19. Zhang JD, Li XL. [Chromium pollution of soil and water in Jinzhou]. *Zhonghua Yu Fang Yi Xue Za Zhi* 1987;21(5):262-4.
20. Linos A, Petralias A, Christophi CA, et al. Oral ingestion of hexavalent chromium through drinking water and cancer mortality in an industrial area of Greece--an ecological study. *Environ Health* 2011;10:50. doi: 10.1186/1476-069X-10-50
21. Bello-Reuss EN, Grady TP, Mazumdar DC. Serum vanadium levels in chronic renal disease. *Ann Intern Med* 1979;91(5):743.
22. Tonelli M, Wiebe N, Hemmelgarn B, et al. Trace elements in hemodialysis patients: a systematic review and meta-analysis. *BMC Med* 2009;7:25. doi: 10.1186/1741-7015-7-25
23. Shaban H, Ubaid-Ullah M, Berns JS. Measuring vitamin, mineral, and trace element levels in dialysis patients. *Semin Dial* 2014;27(6):582-6. doi: 10.1111/sdi.12260
24. Filler G, Felder S. Trace elements in dialysis. *Pediatr Nephrol* 2014;29(8):1329-35. doi: 10.1007/s00467-013-2585-6 [published Online First: 2013/08/21]
25. Kidney Disease: Improving Global Outcomes CKD-MBDWG. KDIGO clinical practice guideline for the diagnosis, evaluation, prevention, and treatment of Chronic Kidney Disease-Mineral and Bone Disorder (CKD-MBD). *Kidney Int Suppl* 2009(113):S1-130. doi: 10.1038/ki.2009.188
26. Schwartz GJ, Munoz A, Schneider MF, et al. New equations to estimate GFR in children with CKD. *Journal of the American Society of Nephrology : JASN* 2009;20(3):629-37. doi: 10.1681/ASN.2008030287
27. Filler G, Lepage N. Should the Schwartz formula for estimation of GFR be replaced by cystatin C formula? *Pediatric nephrology* 2003;18(10):981-5. doi: 10.1007/s00467-003-1271-5
28. Grubb A, Blirup-Jensen S, Lindstrom V, et al. First certified reference material for cystatin C in human serum ERM-DA471/IFCC. *Clin Chem Lab Med* 2010;48(11):1619-21. doi: 10.1515/CCLM.2010.318 [published Online First: 2010/11/03]
29. Agency EP. Chromium in Drinking Water 2015 [Available from: <https://www.epa.gov/dwstandardsregulations/chromium-drinking-water> accessed July 15 2016.
30. Canada H. Chromium and its Compounds: Government of Canada; 2007 [updated December 14 2007. accessed October 12 2016.
31. Rehder D. The future of/for vanadium. *Dalton Trans* 2013;42(33):11749-61. doi: 10.1039/c3dt50457c
32. Scior T, Guevara-Garcia A, Bernard P, et al. Are vanadium compounds drugable? Structures and effects of antidiabetic vanadium compounds: a critical review. *Mini Rev Med Chem* 2005;5(11):995-1008.
33. Sidhu H, Filler G, Belostotsky V, et al. High prevalence of elevated Vanadium levels in CKD patients. *Pediatric nephrology* 2016;31(10):1907-08.
34. BHPBilliton. EKATI Diamond Mine - Site-Specific Water Quality Objective for Vanadium Canada April 2012 [Available from: <http://www.mvlwb.ca/Boards/WLWB/Registry/2012/W2012L2-0001/W2012L2-0001 - Ekati - Report - SSWQO - Vanadium - Apr 26 12.pdf> accessed July 11 2016.
35. Assessment OoEHH. Proposed Notification Level for Vanadium California 2000 [Available from: <http://oehha.ca.gov/water/notification-level/proposed-notification-level-vanadium> accessed July 11 2016 2016.

- 1  
2  
3 36. Water F-P-TCoD. Guidelines for Canadian Drinking Water Quality Canada October 2014  
4 [Available from: [http://www.hc-sc.gc.ca/ewh-semt/alt\\_formats/pdf/pubs/water-  
6 eau/sum\\_guide-res\\_recom/sum\\_guide-res\\_recom\\_2014-10\\_eng.pdf](http://www.hc-sc.gc.ca/ewh-semt/alt_formats/pdf/pubs/water-<br/>5 eau/sum_guide-res_recom/sum_guide-res_recom_2014-10_eng.pdf) accessed July 11  
7 2016.
- 8 37. Canada GoC-EaCC. Water Quality Guidelines Used by Ontario Canada 2016 [updated  
9 February 17, 2016. Available from: [https://www.ec.gc.ca/indicateurs-  
11 indicateurs/default.asp?lang=en&n=93177156-1](https://www.ec.gc.ca/indicateurs-<br/>10 indicateurs/default.asp?lang=en&n=93177156-1) accessed July 11 2016.
- 12 38. Environment OMot. Soil, Ground Water and Sediment Standards for Use Under Part XV.1 of  
13 the Environmental Protection Act Canada April 15, 2011 [Available from:  
14 [https://dr6j45jk9xcmk.cloudfront.net/documents/998/3-6-3-sediment-standards-  
16 en.pdf](https://dr6j45jk9xcmk.cloudfront.net/documents/998/3-6-3-sediment-standards-<br/>15 en.pdf) accessed July 11 2016.
- 17 39. Environment TCCoMot. Vanadium Canada 1997 [updated 1999. Available from:  
18 <http://ceqg-rcqe.ccme.ca/download/en/286> accessed July 11 2016.
- 19 40. Copat C, Arena G, Fiore M, et al. Heavy metals concentrations in fish and shellfish from  
20 eastern Mediterranean Sea: consumption advisories. *Food and chemical toxicology : an  
21 international journal published for the British Industrial Biological Research Association*  
22 2013;53:33-7. doi: 10.1016/j.fct.2012.11.038 [published Online First: 2012/12/06]
- 23 41. Imtiaz M, Rizwan MS, Xiong S, et al. Vanadium, recent advancements and research  
24 prospects: A review. *Environment international* 2015;80:79-88. doi:  
25 10.1016/j.envint.2015.03.018 [published Online First: 2015/04/22]
- 26 42. Waikar SS, Sabbiseti V, Arnlov J, et al. Relationship of proximal tubular injury to chronic  
27 kidney disease as assessed by urinary kidney injury molecule-1 in five cohort studies.  
28 *Nephrol Dial Transplant* 2016;31(9):1460-70. doi: 10.1093/ndt/gfw203 [published  
29 Online First: 2016/06/09]
- 30 43. Soudani N, Sefi M, Ben Amara I, et al. Protective effects of Selenium (Se) on Chromium  
31 (VI) induced nephrotoxicity in adult rats. *Ecotoxicol Environ Saf* 2010;73(4):671-8. doi:  
32 10.1016/j.ecoenv.2009.10.002 [published Online First: 2009/11/17]
- 33  
34  
35  
36  
37  
38  
39  
40  
41  
42  
43  
44  
45  
46  
47  
48  
49  
50  
51  
52  
53  
54  
55  
56  
57  
58  
59  
60

### Contributors' Statement

Contributors GF and VB articulated the conceptual framework for both the original RCT study and this ancillary study. GF developed the analytical approach and GF and MK analysed the data. GF, MK, and HKS drafted and edited the manuscript. VB, SHSH and LY contributed to the interpretation of data, added intellectual content during manuscript preparation and provided valuable feedback on various aspects of the manuscript. All authors read and approved the final manuscript.

For peer review only

| Variable                                              | n (%)    |
|-------------------------------------------------------|----------|
| <b>Gender</b>                                         |          |
| Male                                                  | 22 (58%) |
| Female                                                | 16 (42%) |
| <b>Age group (years)</b>                              |          |
| 4 to 10                                               | 18 (47%) |
| 11 to 15                                              | 9 (24%)  |
| 16 to 18                                              | 11 (29%) |
| <b>Primary Diagnosis</b>                              |          |
| <i>Hereditary</i>                                     |          |
| Renal Dysplasia                                       | 11 (31%) |
| Metabolic Disorders                                   | 5 (14%)  |
| Nephronophthisis                                      | 2 (6%)   |
| Autosomal Recessive Polycystic Kidney Disease         | 2 (6%)   |
| Autosomal Dominant Polycystic Kidney Disease          | 1 (3%)   |
| Congenital Nephrotic Syndrome                         | 1 (3%)   |
| Alport Syndrome                                       | 1 (3%)   |
| <i>Acquired</i>                                       |          |
| Reflux Nephropathy                                    | 4 (11%)  |
| Haemolytic Uremic Syndrome                            | 3 (8%)   |
| Glomerulonephritis/Focal Segmental Glomerulosclerosis | 3 (8%)   |
| Tubulopathy                                           | 2 (6%)   |
| Ischaemic Renal Injury                                | 1 (3%)   |
| <b>Kidney Transplant</b>                              |          |
| Yes                                                   | 13 (36%) |
| No                                                    | 23 (64%) |

**Table 1. Patient Demographics.**

| Paediatric Reference Intervals |       |       |        |       |
|--------------------------------|-------|-------|--------|-------|
|                                | µg/L  |       | µmol/L |       |
|                                | Lower | Upper | Lower  | Upper |
| Vanadium                       | 0.032 | 0.088 | 0.6    | 1.7   |
| Chromium                       | 0.13  | 0.31  | 2.5    | 6     |

**Table 2. Paediatric reference intervals used in our study.** Paediatric-specific vanadium and chromium reference intervals were not available. Source:

[http://www.lhsc.on.ca/lab/memos/Reference\\_Ranges\\_for\\_Trace\\_Elements\\_2014\\_11\\_03.pdf](http://www.lhsc.on.ca/lab/memos/Reference_Ranges_for_Trace_Elements_2014_11_03.pdf).

1  
2  
3 **Figure 1. Patient flowchart.** Of the 38 subjects assessed for eligibility in the study, we included  
4  
5 36 in our analysis. These 36 patients had 94 trace element panel measurements.  
6  
7

8  
9 **Figure 2. Scatter plot of vanadium levels versus eGFR.** Vanadium levels [ $\mu\text{g/L}$ ] were not  
10 normally distributed. The non-linear regression line (one-phase exponential decay) has been  
11 included. GFR was measured in  $\text{mL/min/1.73 m}^2$ . The formula reads:  $Y=(Y_0 - \text{Plateau})\cdot\exp(-$   
12  $K\cdot x) + \text{Plateau}$ , where  $Y_0$  is the value when  $x$  is zero, plateau is  $Y$  at a large value,  $K$  is the rate  
13 constant, and the values were  $Y_0=4.555$ ,  $\text{Plateau}=0.1457$ , and  $K=0.1111$  (GraphPad Prism).  
14  
15  
16  
17  
18  
19

20  
21 **Figure 3. Repeated measures plot of first and last vanadium level in those patients who had**  
22 **repeated levels.** Vanadium levels [ $\mu\text{g/L}$ ] were not normally distributed. While the median  
23 vanadium level lowered from 0.1510 to 0.1410  $\mu\text{g/L}$  and many patients demonstrated an increase  
24 of their vanadium level with repeated measures, this did not reach statistical significance  
25 ( $p=0.4140$ , Wilcoxon matched-pairs signed rank test).  
26  
27  
28  
29  
30  
31  
32

33 **Figure 4. Scatter plot of chromium levels versus eGFR.** Chromium levels [ $\mu\text{g/L}$ ] were not  
34 normally distributed. The non-linear regression line (one-phase exponential decay) has been  
35 included. GFR was measured in  $\text{mL/min/1.73 m}^2$ . The formula reads:  $Y=(Y_0 - \text{Plateau})\cdot\exp(-$   
36  $K\cdot x) + \text{Plateau}$ , where  $Y_0$  is the value when  $x$  is zero, plateau is  $Y$  at a large value,  $K$  is the rate  
37 constant, and the values were  $Y_0=1.641$ ,  $\text{Plateau}=0.4841$ , and  $K=0.09060$  (GraphPad Prism).  
38  
39  
40  
41  
42  
43  
44  
45

46 **Figure 5. Repeated measures plot of first and last chromium level in those patients who had**  
47 **repeated levels.** Chromium levels [ $\mu\text{g/L}$ ] were not normally distributed. The median chromium  
48 level did not change from 0.44  $\mu\text{g/L}$  and the rise in the values was not statistically significant  
49 ( $p=0.3381$ , Wilcoxon matched-pairs signed rank test).  
50  
51  
52  
53  
54  
55  
56  
57  
58  
59  
60



1  
2  
3 **Figure 6. Heat map showing the concentration of vanadium in 2014 in various streams**  
4 **around Southwestern Ontario.** Map created using 2014 data from the Provincial (Stream)  
5  
6 Water Quality Monitoring Network at [https://www.ontario.ca/data/provincial-stream-water-](https://www.ontario.ca/data/provincial-stream-water-quality-monitoring-network)  
7  
8 [quality-monitoring-network](https://www.ontario.ca/data/provincial-stream-water-quality-monitoring-network) in open source software found at [www.openheatmap.com](http://www.openheatmap.com)  
9  
10

11  
12 **Figure 7. Heat map showing the concentration of chromium in 2014 in various streams**  
13 **around Southwestern Ontario.** Map created using 2014 data from the Provincial (Stream)  
14  
15 Water Quality Monitoring Network at [https://www.ontario.ca/data/provincial-stream-water-](https://www.ontario.ca/data/provincial-stream-water-quality-monitoring-network)  
16  
17 [quality-monitoring-network](https://www.ontario.ca/data/provincial-stream-water-quality-monitoring-network) in open source software found at [www.openheatmap.com](http://www.openheatmap.com)  
18  
19  
20  
21  
22  
23  
24  
25  
26  
27  
28  
29  
30  
31  
32  
33  
34  
35  
36  
37  
38  
39  
40  
41  
42  
43  
44  
45  
46  
47  
48  
49  
50  
51  
52  
53  
54  
55  
56  
57  
58  
59  
60

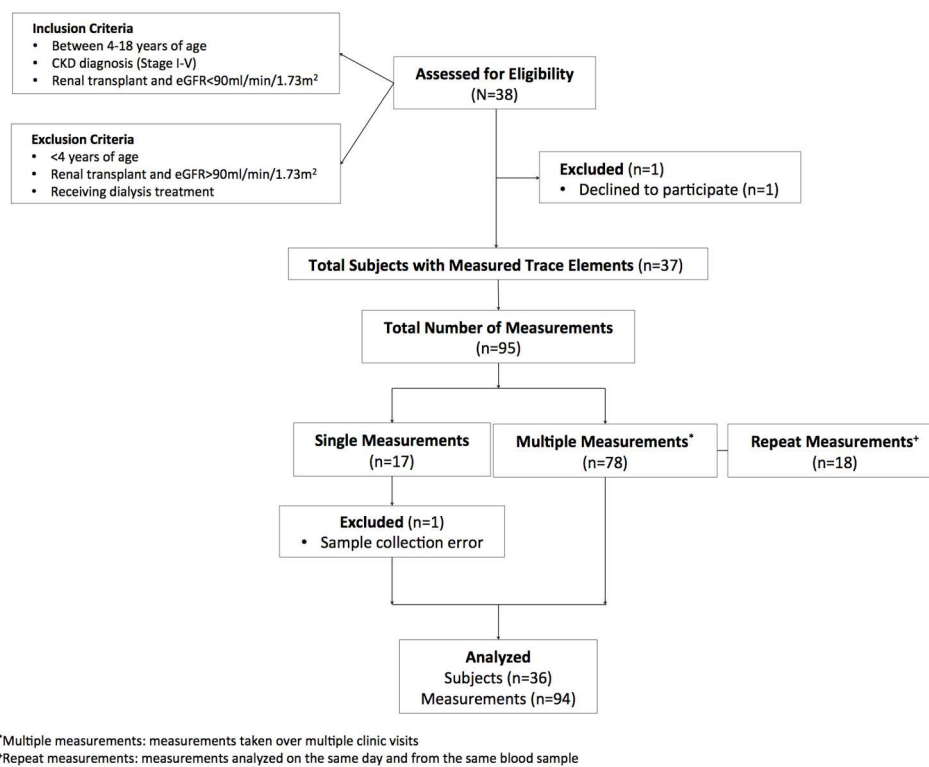

Figure 1. Patient flowchart. Of the 38 subjects assessed for eligibility in the study, we included 36 in our analysis. These 36 patients had 94 trace element panel measurements.

147x123mm (300 x 300 DPI)



Figure 2. Scatter plot of vanadium levels versus eGFR. Vanadium levels [µg/L] were not normally distributed. The non-linear regression line (one-phase exponential decay) has been included. GFR was measured in mL/min/1.73 m<sup>2</sup>. The formula reads:  $Y=(Y_0 - \text{Plateau}) \cdot \exp(-K \cdot x) + \text{Plateau}$ , where  $Y_0$  is the value when  $x$  is zero, plateau is  $Y$  at a large value,  $K$  is the rate constant, and the values were  $Y_0=4.555$ , Plateau=0.1457, and  $K=0.1111$  (GraphPad Prism).

127x85mm (300 x 300 DPI)

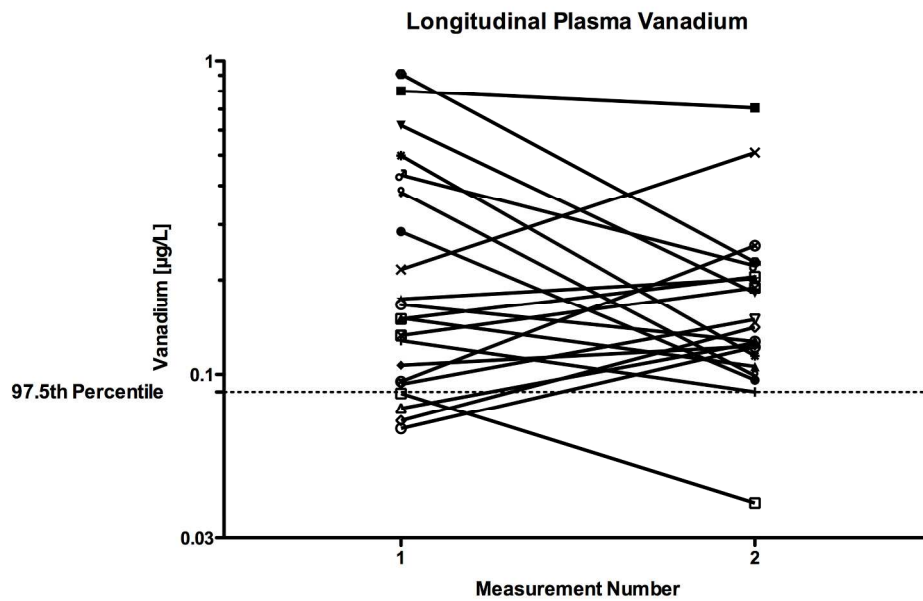

28  
29  
30  
31  
32

Figure 3. Repeated measures plot of first and last vanadium level in those patients who had repeated levels. Vanadium levels [ $\mu\text{g/L}$ ] were not normally distributed. While the median vanadium level lowered from 0.1510 to 0.1410  $\mu\text{g/L}$  and many patients demonstrated an increase of their vanadium level with repeated measures, this did not reach statistical significance ( $p=0.4140$ , Wilcoxon matched-pairs signed rank test).

33  
34  
35  
36  
37  
38  
39  
40  
41  
42  
43  
44  
45  
46  
47  
48  
49  
50  
51  
52  
53  
54  
55  
56  
57  
58  
59  
60

214x136mm (300 x 300 DPI)

1  
2  
3  
4  
5  
6  
7  
8  
9  
10  
11  
12  
13  
14  
15  
16  
17  
18  
19  
20  
21  
22  
23  
24  
25  
26  
27  
28  
29  
30  
31  
32  
33  
34  
35  
36  
37  
38  
39  
40  
41  
42  
43  
44  
45  
46  
47  
48  
49  
50  
51  
52  
53  
54  
55  
56  
57  
58  
59  
60

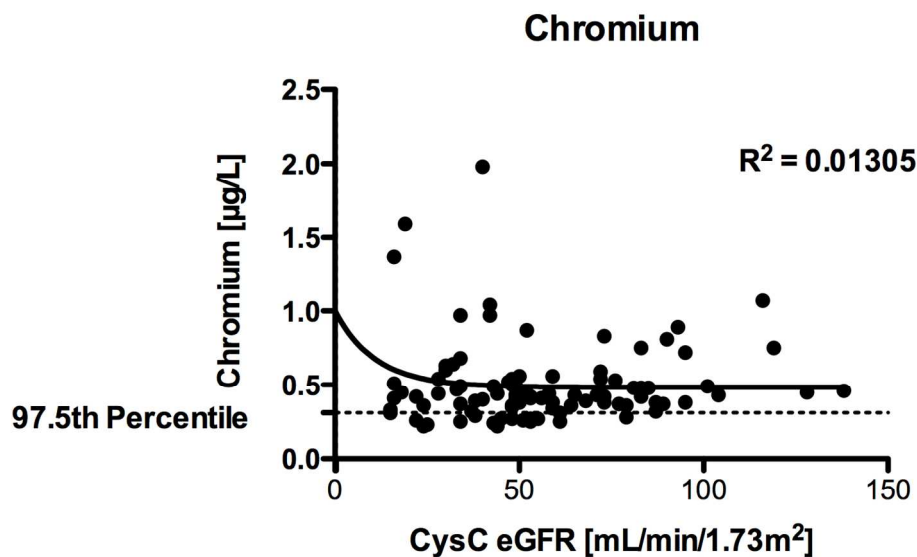

Figure 4. Scatter plot of chromium levels versus eGFR. Chromium levels [µg/L] were not normally distributed. The non-linear regression line (one-phase exponential decay) has been included. GFR was measured in mL/min/1.73 m<sup>2</sup>. The formula reads:  $Y=(Y_0 - \text{Plateau}) \cdot \exp(-K \cdot x) + \text{Plateau}$ , where  $Y_0$  is the value when  $x$  is zero, plateau is  $Y$  at a large value,  $K$  is the rate constant, and the values were  $Y_0=1.641$ , Plateau=0.4841, and  $K=0.09060$  (GraphPad Prism).

138x85mm (300 x 300 DPI)

ew only

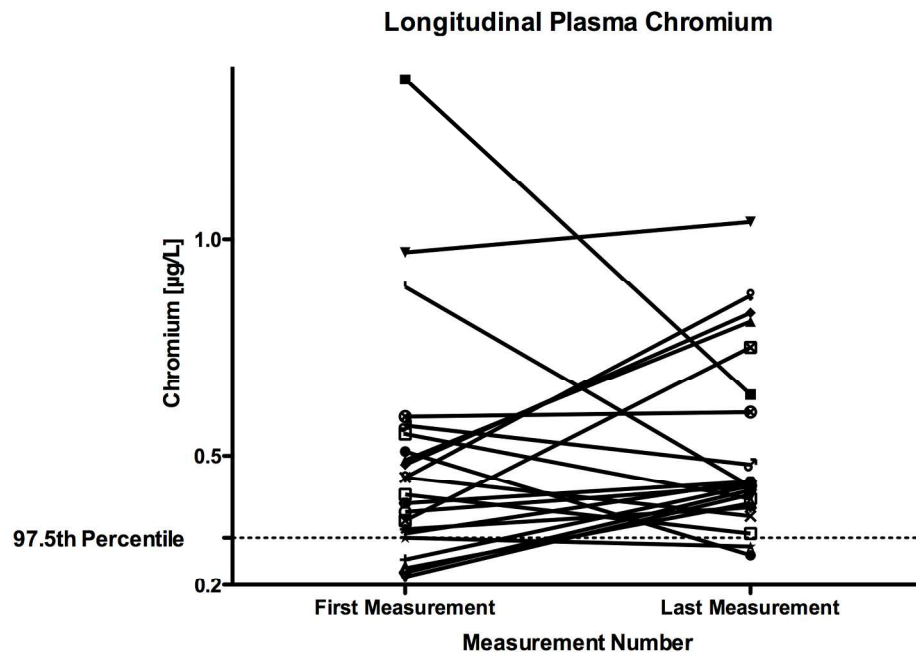

Figure 5. Repeated measures plot of first and last chromium level in those patients who had repeated levels. Chromium levels [ $\mu\text{g/L}$ ] were not normally distributed. The median chromium level did not change from 0.44  $\mu\text{g/L}$  and the rise in the values was not statistically significant ( $p=0.3381$ , Wilcoxon matched-pairs signed rank test).

190x132mm (300 x 300 DPI)

1  
2  
3  
4  
5  
6  
7  
8  
9  
10  
11  
12  
13  
14  
15  
16  
17  
18  
19  
20  
21  
22  
23  
24  
25  
26  
27  
28  
29  
30  
31  
32  
33  
34  
35  
36  
37  
38  
39  
40  
41  
42  
43  
44  
45  
46  
47  
48  
49  
50  
51  
52  
53  
54  
55  
56  
57  
58  
59  
60

### Heat Map Vanadium

OPENHEATMAP

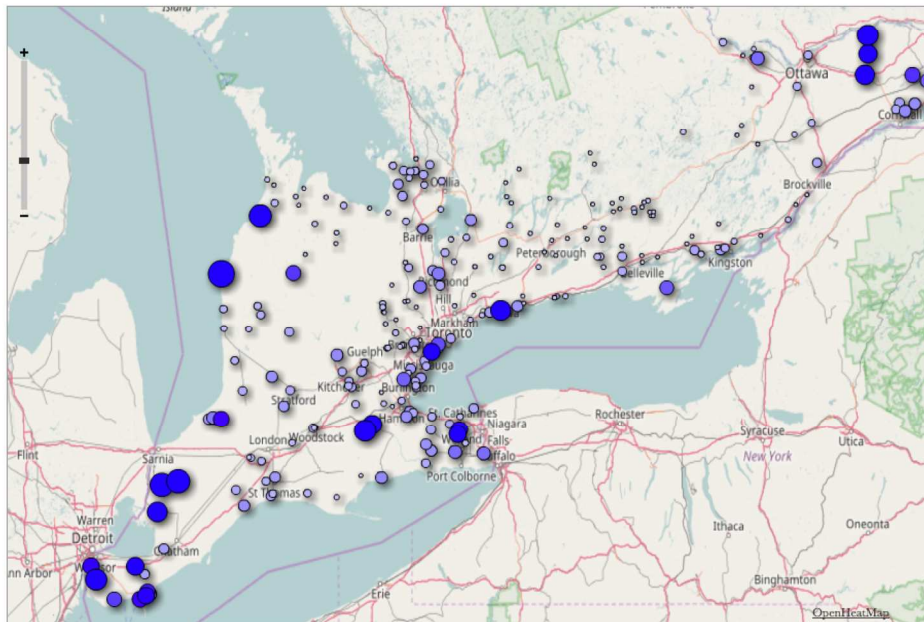

Value 0.119 1.36 2.60

Figure 6. Heat map showing the concentration of vanadium in 2014 in various streams around Southwestern Ontario. Map created using 2014 data from the Provincial (Stream) Water Quality Monitoring Network at <https://www.ontario.ca/data/provincial-stream-water-quality-monitoring-network> in open source software found at [www.openheatmap.com](http://www.openheatmap.com).

188x148mm (300 x 300 DPI)

only

1  
2  
3  
4  
5  
6  
7  
8  
9  
10  
11  
12  
13  
14  
15  
16  
17  
18  
19  
20  
21  
22  
23  
24  
25  
26  
27  
28  
29  
30  
31  
32  
33  
34  
35  
36  
37  
38  
39  
40  
41  
42  
43  
44  
45  
46  
47  
48  
49  
50  
51  
52  
53  
54  
55  
56  
57  
58  
59  
60

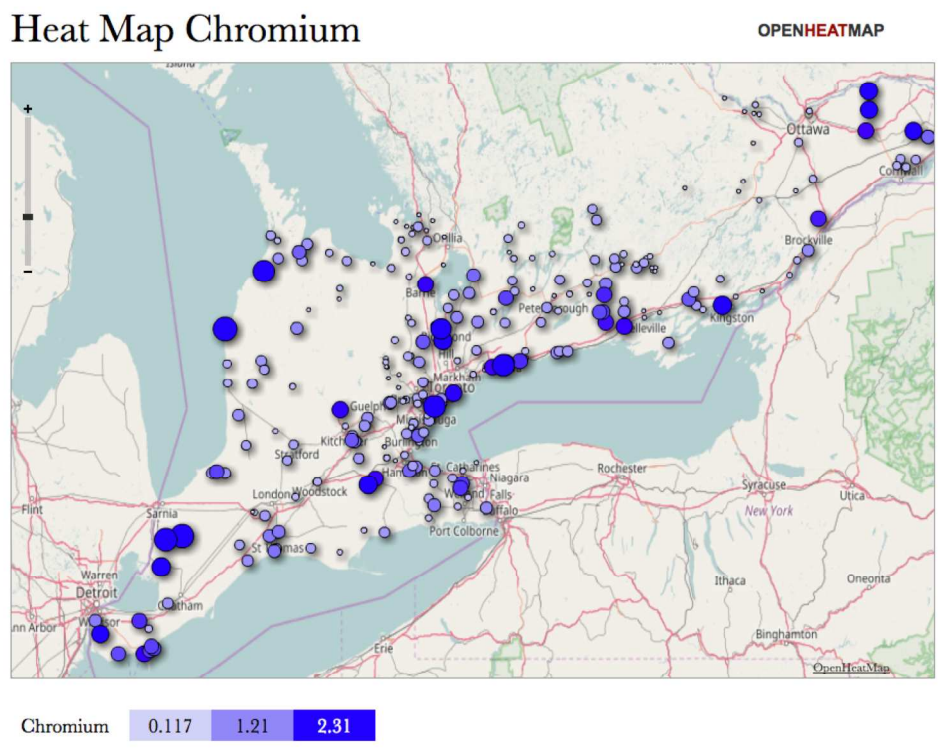

Figure 7. Heat map showing the concentration of chromium in 2014 in various streams around Southwestern Ontario. Map created using 2014 data from the Provincial (Stream) Water Quality Monitoring Network at <https://www.ontario.ca/data/provincial-stream-water-quality-monitoring-network> in open source software found at [www.openheatmap.com](http://www.openheatmap.com).

190x149mm (300 x 300 DPI)

only



STROBE 2007 (v4) Statement—Checklist of items that should be included in reports of *cross-sectional studies*

| Section/Topic                | Item # | Recommendation                                                                                                                                                                       | Reported on page # |
|------------------------------|--------|--------------------------------------------------------------------------------------------------------------------------------------------------------------------------------------|--------------------|
| Title and abstract           | 1      | (a) Indicate the study's design with a commonly used term in the title or the abstract                                                                                               | 1                  |
|                              |        | (b) Provide in the abstract an informative and balanced summary of what was done and what was found                                                                                  | 2                  |
| <b>Introduction</b>          |        |                                                                                                                                                                                      |                    |
| Background/rationale         | 2      | Explain the scientific background and rationale for the investigation being reported                                                                                                 | 4-5                |
| Objectives                   | 3      | State specific objectives, including any prespecified hypotheses                                                                                                                     | 5                  |
| <b>Methods</b>               |        |                                                                                                                                                                                      |                    |
| Study design                 | 4      | Present key elements of study design early in the paper                                                                                                                              | 6                  |
| Setting                      | 5      | Describe the setting, locations, and relevant dates, including periods of recruitment, exposure, follow-up, and data collection                                                      | 6                  |
| Participants                 | 6      | (a) Give the eligibility criteria, and the sources and methods of selection of participants                                                                                          | 6<br>Figure 1      |
| Variables                    | 7      | Clearly define all <i>outcomes</i> , exposures, predictors, potential confounders, and effect modifiers. Give diagnostic criteria, if applicable                                     | 6                  |
| Data sources/<br>measurement | 8*     | For each variable of interest, give sources of data and details of methods of assessment (measurement). Describe comparability of assessment methods if there is more than one group | 6-7                |
| Bias                         | 9      | Describe any efforts to address potential sources of bias                                                                                                                            | 6                  |
| Study size                   | 10     | Explain how the study size was arrived at                                                                                                                                            | 6                  |
| Quantitative variables       | 11     | Explain how quantitative variables were handled in the analyses. If applicable, describe which groupings were chosen and why                                                         | 6-8                |
| Statistical methods          | 12     | (a) Describe all statistical methods, including those used to control for confounding                                                                                                | 7                  |
|                              |        | (b) Describe any methods used to examine subgroups and interactions                                                                                                                  | 8                  |
|                              |        | (c) Explain how missing data were addressed                                                                                                                                          | 7-8                |
|                              |        | (d) If applicable, describe analytical methods taking account of sampling strategy                                                                                                   | N/A                |
|                              |        | (e) Describe any sensitivity analyses                                                                                                                                                | 7                  |
| <b>Results</b>               |        |                                                                                                                                                                                      |                    |

|                          |     |                                                                                                                                                                                                               |           |
|--------------------------|-----|---------------------------------------------------------------------------------------------------------------------------------------------------------------------------------------------------------------|-----------|
| Participants             | 13* | (a) Report numbers of individuals at each stage of study—eg numbers potentially eligible, examined for eligibility, confirmed eligible, included in the study, completing follow-up, and analysed             | Figure 1  |
|                          |     | (b) Give reasons for non-participation at each stage                                                                                                                                                          | Figure 1  |
|                          |     | (c) Consider use of a flow diagram                                                                                                                                                                            | Figure 1  |
| Descriptive data         | 14* | (a) Give characteristics of study participants (eg demographic, clinical, social) and information on exposures and potential confounders                                                                      | 8         |
|                          |     | (b) Indicate number of participants with missing data for each variable of interest                                                                                                                           | Figure 1  |
| Outcome data             | 15* | Report numbers of outcome events or summary measures                                                                                                                                                          | 8-9       |
| Main results             | 16  | (a) Give unadjusted estimates and, if applicable, confounder-adjusted estimates and their precision (eg, 95% confidence interval). Make clear which confounders were adjusted for and why they were included. | 8-9       |
|                          |     | (b) Report category boundaries when continuous variables were categorized                                                                                                                                     | N/A       |
|                          |     | (c) If relevant, consider translating estimates of relative risk into absolute risk for a meaningful time period                                                                                              | N/A       |
| Other analyses           | 17  | Report other analyses done—eg analyses of subgroups and interactions, and sensitivity analyses                                                                                                                | 8-9       |
| <b>Discussion</b>        |     |                                                                                                                                                                                                               |           |
| Key results              | 18  | Summarise key results with reference to study objectives                                                                                                                                                      | 10        |
| Limitations              | 19  | Discuss limitations of the study, taking into account sources of potential bias or imprecision. Discuss both direction and magnitude of any potential bias                                                    | 13-14     |
| Interpretation           | 20  | Give a cautious overall interpretation of results considering objectives, limitations, multiplicity of analyses, results from similar studies, and other relevant evidence                                    | 11, 13-14 |
| Generalisability         | 21  | Discuss the generalisability (external validity) of the study results                                                                                                                                         | 14        |
| <b>Other information</b> |     |                                                                                                                                                                                                               |           |
| Funding                  | 22  | Give the source of funding and the role of the funders for the present study and, if applicable, for the original study on which the present article is based                                                 | 1         |

\*Give information separately for cases and controls in case-control studies and, if applicable, for exposed and unexposed groups in cohort and cross-sectional studies.

**Note:** An Explanation and Elaboration article discusses each checklist item and gives methodological background and published examples of transparent reporting. The STROBE checklist is best used in conjunction with this article (freely available on the Web sites of PLoS Medicine at <http://www.plosmedicine.org/>, Annals of Internal Medicine at <http://www.annals.org/>, and Epidemiology at <http://www.epidem.com/>). Information on the STROBE Initiative is available at [www.strobe-statement.org](http://www.strobe-statement.org).
